# Supplementary material for: Alterations of in vivo CA1 network activity in Dp(16)1Yey Down syndrome model mice
Source: eLife. 2018 Feb 27;7:e31543. doi: 10.7554/eLife.31543 (PMC5841929; doi:10.7554/eLife.31543)
Supplement: Figure 1—source data 1. [file elife-31543-fig1-data1.xlsx]

## Sheet: Figure 1
Group	Place field size (cm2)	Spatial information (bits/sec)	Peak firing rate (Hz)	Mean firing rate (Hz)	In-field Firing rate (Hz)	Out-field Firing rate (Hz)	Complex spiking index				Place field size (cm2)	Spatial information (bits/sec)	Peak firing rate (Hz)	Mean firing rate (Hz)	In-field Firing rate (Hz)	Out-field Firing rate (Hz)	Complex spiking index
Dp16	143	0.2211	5.0194	1.2952	2.1003	1.4374	2.2329		Dp16	avg.	108.436	0.650501	5.54617	0.951877	2.79059	1.66764	9.38402
Dp16	43	0.2712	3.3987	0.1308	1.8858	0.7336	10.9489			SEM	4.56769	0.027018	0.198796	0.0470259	0.103046	0.0660983	0.463992
Dp16	46	0.9341	12.4077	2.5687	5.7997	3.9706	12.9676		WT	avg.	86.3711	0.788513	6.51561	0.975041	3.24218	1.81151	14.2868
Dp16	60	0.3916	4.4455	0.8656	1.8991	1.3407	23.5498			SEM	3.68969	0.0334659	0.235337	0.0523679	0.118366	0.08922	0.71538
Dp16	95	1.0511	6.8507	1.5053	3.6901	2.5818	5.6473
Dp16	42	0.6899	7.4206	0.4369	3.6214	2.0486	3.5088			pvalue	0.000754276	0.00301192	0.00358066	0.949001	0.00462892	0.435463	1.87338e-06
Dp16	39	0.2728	3.394	0.2341	1.7575	0.7709	7.947
Dp16	28	0.6777	8.6965	0.3721	4.1474	1.865	7.9051		Dp16	min	2	0.0937	1.0021	0.0687	0.5029	0	-5.8333
Dp16	24	1.1613	12.2869	1.8364	7.0612	3.7919	6.0403		Dp16	Q1	52.5	0.32565	3.16275	0.3564	1.56435	0.9031	3.80965
Dp16	14	1.1981	11.7594	0.6847	6.9069	4.1742	9.3168		Dp16	median	93	0.5638	4.9733	0.7122	2.4506	1.4386	8.2011
Dp16	18	0.8266	7.0223	0.3763	3.8063	3.0013	10.9589		Dp16	Q3	148.5	0.8492	7.0184	1.3982	3.57425	2.1558	13.4258
Dp16	86	0.1097	1.2347	0.3198	0.6154	0.3951	11.4943		Dp16	Max	484	3.1547	16.3318	3.4542	8.2641	6.1859	39.3013
Dp16	27	0.5651	9.6822	1.5762	4.6905	2.8087	6.4174
Dp16	59	0.2083	1.9296	0.2245	0.9236	0.6747	1.4925		WT	min	4	0.0923	1.0357	0.049	0.5332	0	-6.8627
Dp16	13	0.1016	1.1487	0.2148	0.5463	0.3952	6.9672		WT	Q1	48.75	0.39915	3.6934	0.370025	1.81757	0.68375	5.8284
Dp16	220	0.368	2.6081	0.7034	1.3678	0.6398	-0.3205		WT	median	73	0.69285	6.02945	0.7584	2.97345	1.6638	11.275
Dp16	115	0.8443	9.4897	1.8827	4.722	2.6017	8.9512		WT	Q3	109	1.07025	8.55505	1.26273	4.29678	2.45817	19.7951
Dp16	114	0.6944	8.2365	1.0543	3.7529	1.9859	4.2553		WT	Max	363	2.7745	18.8074	4.2429	9.1105	10.5664	60.4938
Dp16	238	0.5502	7.3655	2.5727	3.1674	2.4445	5.8557
Dp16	44	0.6272	11.3393	2.4847	5.2919	3.1992	3.3148
Dp16	65	1.3671	12.0083	2.7583	6.3252	4.3449	8.3672
Dp16	55	0.635	4.4773	0.3349	1.9898	2.1224	12.9278
Dp16	24	0.3427	4.3576	0.8261	2.502	1.3543	6.8392
Dp16	12	0.3058	5.9501	0.6137	2.9209	2.1786	5.8761
Dp16	104	0.3496	4.4017	1.3323	2.5114	1.4359	13.6237
Dp16	63	0.546	4.756	0.2794	2.6132	2.2823	13.3333
Dp16	20	0.1679	2.2228	0.0937	1.1583	0.713	3.4483
Dp16	15	0.1969	5.1356	0.1037	2.6852	0	13.3858
Dp16	34	0.1593	1.5403	0.1619	0.9974	0.4119	-2.027
Dp16	54	0.5037	5.7598	1.0238	2.532	2.1142	4.6563
Dp16	40	1.1079	11.5649	0.4649	5.812	0	11.0787
Dp16	48	0.2154	2.1844	0.2869	1.0787	0.5919	8.2725
Dp16	60	0.2397	2.8867	0.1663	1.4405	0.8104	2.924
Dp16	127	0.8803	7.7021	1.3457	4.5855	2.0153	0.951
Dp16	29	0.3031	2.9557	0.2137	1.2747	0.978	23.494
Dp16	38	0.2797	2.9961	0.3083	1.6355	0.9954	9.8837
Dp16	29	0.6263	9.4317	2.1414	3.6599	2.8173	10.3348
Dp16	67	0.3296	1.8438	0.1845	0.9434	0.5686	0.8658
Dp16	25	0.2305	2.7223	0.16	1.4831	0.69	0.8547
Dp16	45	0.5504	4.7909	0.374	2.7161	1.333	12.069
Dp16	62	0.7345	10.0509	1.9778	4.3784	3.0213	3.3051
Dp16	92	0.2906	2.4328	0.2713	1.3787	0.6765	16.1585
Dp16	38	0.3906	5.1153	0.3004	2.2966	1.3594	13.4545
Dp16	70	0.662	5.0705	0.2939	2.7548	1.0465	10.4615
Dp16	78	0.1463	1.0021	0.0687	0.5029	0.2218	-2.2556
Dp16	101	1.5181	10.1261	2.5525	5.5182	3.8502	15.9526
Dp16	78	0.3267	4.3731	0.9475	2.2167	1.3986	2.109
Dp16	246	0.1352	2.3321	0.7568	0.8084	0.7192	1.171
Dp16	114	1.6575	8.9455	1.0364	5.1319	2.6757	8.1552
Dp16	131	0.5823	5.3883	1.7294	2.6424	1.9352	5.9667
Dp16	75	0.3615	4.8499	1.0389	1.9788	1.6847	6.6498
Dp16	134	0.1748	1.25	0.3809	0.6205	0.479	3.3501
Dp16	54	0.3364	5.3582	0.8788	3.0336	1.5996	3.7483
Dp16	79	0.6614	5.1299	0.3805	2.5132	1.7222	26.9155
Dp16	120	0.5601	3.6813	0.7671	1.889	1.5833	28.683
Dp16	91	0.1177	1.2911	0.3424	0.6556	0.4128	0.6079
Dp16	72	0.5686	4.5336	0.2439	2.1515	1.4482	20.7865
Dp16	57	0.2065	1.7587	0.0921	0.879	0	12.6761
Dp16	200	0.4957	6.1845	1.9686	2.5093	2.0464	13.4649
Dp16	99	1.1016	6.1724	0.5721	3.4693	1.5661	15.122
Dp16	127	0.1644	1.4888	0.3524	0.7056	0.4846	0.9009
Dp16	30	0.3995	3.3121	0.4288	1.9349	1.3068	16.0156
Dp16	141	1.2817	9.7661	3.21	4.7474	3.4223	6.675
Dp16	39	0.5638	5.2539	0.5358	2.7929	1.7095	15.5303
Dp16	105	0.656	4.5619	0.813	2.4277	1.1932	1.6556
Dp16	54	1.0725	8.7231	1.4289	5.1593	2.9058	1.0267
Dp16	127	0.3344	3.1409	1.0094	1.6533	1.1952	0.3347
Dp16	57	0.0937	1.2896	0.1357	0.5396	0.3008	2.2599
Dp16	306	0.3138	4.1414	1.1628	1.7871	1.1036	-3.6301
Dp16	63	0.2625	4.9336	0.4457	2.1642	1.0184	5.4348
Dp16	116	0.468	2.5398	0.3278	1.4318	0.6782	19.802
Dp16	109	0.2978	3.3503	0.6121	1.655	0.9951	7.3276
Dp16	61	0.9154	8.0728	1.2145	4.0304	2.9505	3.0348
Dp16	112	0.6667	7.2051	0.8544	2.9691	2.9402	0.3643
Dp16	125	0.74	6.1167	1.7347	3.0155	2.0953	7.3333
Dp16	80	0.4544	2.7276	0.3433	1.3116	1.2942	7.0968
Dp16	147	0.7731	5.5021	1.6387	2.7729	1.8626	3.1176
Dp16	32	0.307	2.5859	0.4958	1.3673	0.9186	2.5408
Dp16	92	1.0615	12.2408	3.2821	6.3122	3.7532	3.0439
Dp16	46	1.4779	11.1049	0.534	5.7938	0	9.322
Dp16	88	0.8841	5.2305	0.5087	2.8996	1.215	8.8547
Dp16	80	0.4842	2.7658	0.3262	1.5044	0.8312	17.3611
Dp16	33	0.3286	5.3592	0.7122	2.6306	1.5872	4.1968
Dp16	114	0.6231	5.2941	0.6446	2.3398	0	4.2188
Dp16	46	0.6127	4.1206	0.5954	2.4167	1.4751	10.3723
Dp16	18	0.5023	5.7197	0.3163	3.2505	1.8047	22.1675
Dp16	51	1.7554	13.4029	0.8391	7.2574	3.5982	7.1291
Dp16	22	0.9021	11.1951	0.6326	6.1867	4.6702	16.2222
Dp16	164	3.1547	14.4584	2.4228	7.7919	3.4144	8.87
Dp16	47	0.174	1.468	0.0824	0.7921	0	11.4286
Dp16	226	0.2314	3.4696	1.0497	1.2955	1.1591	5.1136
Dp16	119	0.6353	3.9124	0.5569	2.1203	0	9.077
Dp16	77	1.0759	5.8783	0.6827	3.2199	1.9039	16.6003
Dp16	77	1.525	16.3318	2.0394	8.0624	3.4577	5.5611
Dp16	47	0.6333	4.8689	0.2193	2.4895	0	14.791
Dp16	85	0.7639	4.6161	0.3632	2.2688	1.2956	5
Dp16	38	1.4466	15.7185	0.7424	8.1487	0	9.8851
Dp16	57	0.2215	1.7741	0.1154	0.7413	0.5168	15.2941
Dp16	133	1.3047	6.4006	0.7558	3.5796	2.2234	17.7451
Dp16	147	1.1156	4.6062	0.4845	2.6235	0	19.3227
Dp16	96	0.8167	9.2607	2.7051	4.7271	3.0212	8.813
Dp16	124	0.2206	2.6236	0.7446	1.1231	0.9344	19.6016
Dp16	148	0.9517	7.2877	1.6478	3.4531	2.18	1.3986
Dp16	121	0.5645	3.8977	1.0506	2.0136	1.2823	7.7419
Dp16	149	0.491	4.4518	0.9755	1.7718	1.2982	4.1746
Dp16	45	0.4909	4.5137	0.24	2.1957	0.924	6.5359
Dp16	260	0.3917	6.729	2.1341	2.6299	1.9542	6.5876
Dp16	190	1.5114	12.1153	3.4542	5.9265	3.6842	9.5323
Dp16	74	0.3587	2.2543	0.2241	1.2167	0.7975	20.4225
Dp16	109	0.9999	10.6052	3.1853	5.3202	3.4445	1.6479
Dp16	69	0.3415	2.2713	0.3814	1.2436	0.6805	19.8198
Dp16	44	1.2945	15.8058	0.908	8.2641	3.3125	9.8551
Dp16	47	0.4906	4.2764	0.2471	2.2183	0.9928	10.4513
Dp16	93	0.5755	3.8999	0.5071	1.9117	1.4072	7.4901
Dp16	176	0.2562	2.6678	0.9658	1.365	0.8655	-1.4073
Dp16	69	0.4064	2.1529	0.3031	1.1206	0.876	16.4671
Dp16	105	0.8599	5.6219	0.8848	3.0904	1.4697	1.659
Dp16	101	1.685	14.4043	1.9313	6.3728	3.6226	9.1806
Dp16	59	1.3997	11.5012	1.8736	6.0584	3.9757	6.0272
Dp16	84	1.1472	5.3811	0.5676	2.9739	1.768	14.3226
Dp16	197	0.6613	5.0401	1.4769	2.4402	1.6197	2.2803
Dp16	167	0.6508	3.5466	0.6484	1.803	1.4651	1.2926
Dp16	259	0.8697	7.6857	2.6659	3.5689	2.6993	-1.3514
Dp16	32	0.4243	5.2874	0.1619	2.5536	0	9.5652
Dp16	46	0.5697	4.8291	0.3237	2.3145	2.0203	-0.431
Dp16	75	0.4667	3.0156	0.8149	1.4841	1.3152	8.3658
Dp16	71	0.3486	2.0316	0.1516	1.1967	0.5137	24.7573
Dp16	74	0.5638	4.3711	0.5589	2.1523	1.4267	11.3907
Dp16	153	0.3162	2.341	0.6832	1.1075	0.8045	1.3221
Dp16	248	0.7438	5.3573	1.7167	2.6231	1.9144	4.4041
Dp16	97	0.568	4.1694	0.99	2.4829	1.556	15.678
Dp16	67	0.3246	2.6816	0.1567	1.3128	0.8233	23.8889
Dp16	268	0.4482	5.8294	1.8427	2.3948	1.653	3.2346
Dp16	231	2.1197	12.0728	3.3396	5.1163	6.1859	7.9218
Dp16	46	0.5368	4.3065	0.56	2.665	1.4051	-5.8333
Dp16	98	1.2005	7.5278	0.9302	3.782	1.966	19.0055
Dp16	68	0.5119	3.3277	0.2374	1.7204	0.9239	13.6667
Dp16	207	0.9322	7.8561	1.8253	3.5304	2.4686	12.0795
Dp16	120	0.7512	4.166	0.4508	2.4702	1.1361	27.9438
Dp16	39	0.4287	3.8086	0.4105	2.1303	1.097	4.8433
Dp16	37	0.6833	4.9666	0.4242	2.6847	2.0787	11.2319
Dp16	50	0.7005	4.7904	0.3941	2.9373	1.9253	13.3333
Dp16	131	0.4082	1.982	0.2342	1.1708	0.4618	25.8772
Dp16	119	0.3458	2.2913	0.5079	1.133	0.7976	-0.2558
Dp16	61	0.7873	4.229	1.1015	2.1387	1.8641	1.0753
Dp16	178	1.5761	11.6755	2.4485	5.4251	3.4991	9.9063
Dp16	125	0.3983	2.5377	0.4716	1.4212	0.84	12.7103
Dp16	78	0.5958	4.3054	0.3795	2.0279	1.3906	21.5606
Dp16	203	0.4198	2.888	0.5609	1.4671	1.0628	12.3106
Dp16	56	0.9245	6.4105	0.7684	3.6438	1.6336	6.1053
Dp16	46	0.613	3.6506	0.5433	2.0233	1.2885	7.2266
Dp16	154	0.3873	4.5634	0.9318	2.0363	1.236	8.0846
Dp16	147	1.4281	8.4894	1.2007	4.0419	2.2354	4.1312
Dp16	185	0.7312	8.0056	2.175	4.1624	2.2703	3.4789
Dp16	41	0.4746	3.6408	0.2791	2.0536	1.2204	7.9268
Dp16	180	0.6244	3.7446	0.5645	1.7365	1.4211	4.7511
Dp16	51	0.7652	5.0617	0.3535	2.5375	1.3148	11.2179
Dp16	176	1.179	5.7645	0.9712	2.8246	2.0024	13.4864
Dp16	285	1.0645	6.8202	1.6249	3.3049	1.5527	5.1396
Dp16	126	0.7139	4.3627	0.4236	2.3779	1.1742	16.899
Dp16	60	0.1266	1.217	0.1388	0.5554	0.33	39.3013
Dp16	72	0.6571	4.8766	1.0368	2.5297	1.8638	11.1913
Dp16	105	0.4938	3.0777	0.6573	1.8116	1.0913	2.9294
Dp16	232	0.335	5.9448	1.6944	2.3735	1.6669	3.2543
Dp16	157	1.0367	5.5392	0.9521	2.9589	1.7979	12.2581
Dp16	73	0.267	3.1709	0.6282	1.5094	0.9711	-0.7634
Dp16	150	0.3484	4.2089	1.145	2.1799	1.2675	2.5385
Dp16	64	0.1888	1.8092	0.3578	0.7955	0.5459	4.8883
Dp16	55	0.6576	4.985	0.3089	2.499	1.1208	23.4146
Dp16	208	0.6039	4.987	1.2429	2.3077	1.5661	2.6185
Dp16	35	0.6585	5.059	0.4131	2.8893	1.6271	26.3158
Dp16	177	0.6385	5.3942	1.4601	2.7332	1.9585	27.5015
Dp16	89	0.7498	7.1395	1.7119	4.0451	2.6038	6.9377
Dp16	200	0.8468	6.8147	1.5601	3.5535	2.6825	10.2783
Dp16	166	1.1944	10.3362	2.9248	5.1105	3.5833	9.5192
Dp16	18	0.4367	6.0387	0.2853	3.4887	1.3952	14.1892
Dp16	224	1.0136	6.9924	1.6273	3.6909	2.0672	5.46
Dp16	123	0.5471	4.0303	0.5493	2.0059	1.2206	7.529
Dp16	160	0.2769	1.944	0.2617	0.9733	0.4618	13.2203
Dp16	27	0.2917	2.496	0.4484	1.2231	0.9392	8.5366
Dp16	2	0.2061	7.4176	0.2623	6.3957	1.7105	6.5
Dp16	286	0.1789	2.1586	0.6395	0.8828	0.7095	1.0013
Dp16	192	1.7075	8.6398	2.1595	4.6274	2.8368	14.1889
Dp16	100	0.6274	5.4509	0.6444	3.0165	1.5521	5.1128
Dp16	172	0.8148	6.4288	1.4438	3.0735	2.11	16.7864
Dp16	150	0.6971	4.0784	0.7351	2.1841	1.3642	19.7652
Dp16	154	0.5072	4.9477	0.6072	2.3907	1.3879	5.9809
Dp16	308	1.4397	5.9374	1.0985	3.0523	1.6032	16.6458
Dp16	272	0.5009	5.1205	1.3978	2.0497	1.7361	7.8019
Dp16	125	0.528	5.4672	1.1164	2.6508	1.6744	5.5249
Dp16	178	0.9871	9.6137	2.5937	4.0143	3.4713	8.1429
Dp16	141	0.2626	2.6493	0.3875	1.2107	0.719	0.545
Dp16	166	1.2611	9.7803	1.4996	4.0352	3.4046	12.4764
Dp16	137	1.5382	9.3199	0.9398	5.1805	2.4311	14.9808
Dp16	26	0.1586	1.2997	0.1395	0.7409	0.448	0.6536
Dp16	168	1.4806	9.2532	1.5053	4.8638	2.499	12.0113
Dp16	177	0.6022	6.5976	1.9113	2.8995	2.133	14.5861
Dp16	273	0.8352	5.2106	1.0142	2.4651	1.3953	4.2384
Dp16	31	0.2535	2.464	0.2958	1.2114	0.8757	13.3971
Dp16	165	1.8416	10.1746	1.4959	5.7453	2.3191	24.8071
Dp16	116	0.2882	3.3135	0.2548	1.4589	0.7122	25.4826
Dp16	202	1.3302	12.377	2.114	5.9952	5.1292	9.2681
Dp16	42	0.3861	2.2294	0.6314	1.1724	1.009	1.3657
Dp16	176	0.4605	8.9084	2.6469	4.6453	2.4293	0.2412
Dp16	111	0.3417	3.9348	0.8437	1.9716	1.2464	0.2896
Dp16	17	1.2085	10.2108	1.5325	6.2453	3.9315	14.9485
Dp16	220	1.0438	8.4854	1.9186	3.9307	3.0289	7.6297
Dp16	131	0.4459	5.5126	1.8306	2.7747	1.8861	6.2814
Dp16	91	0.2861	2.4783	0.386	1.1437	0.7155	35.0245
Dp16	36	0.3932	3.3198	0.6348	1.3446	1.2951	14.7025
Dp16	97	0.2014	1.7728	0.2326	0.807	0.5056	8.2011
Dp16	54	0.4185	4.2056	0.302	2.2423	1.3017	10.2662
Dp16	132	0.3224	2.8206	0.6298	1.2804	0.9952	8.8663
Dp16	38	0.2188	1.8665	0.2768	0.9073	0.6581	1.5221
Dp16	122	0.4693	5.4961	0.7445	2.4506	1.667	14.9466
Dp16	57	0.7693	11.2601	1.3986	5.7441	2.8026	6.0662
Dp16	134	0.2078	2.0921	0.3719	0.8786	0.6676	8.2067
Dp16	155	0.3098	3.1546	0.5358	1.3536	0.8683	-2.4523
Dp16	154	0.2396	4.4184	1.07	2.0588	1.2504	2.939
Dp16	141	0.6382	4.2125	1.3017	1.9704	1.7581	12.3587
Dp16	161	0.9893	8.6184	1.1838	4.2842	2.3799	4.2766
Dp16	26	0.3776	3.9739	0.4893	2.1689	1.3479	1.084
Dp16	99	0.3228	3.8711	0.7005	1.6264	1.2165	3.871
Dp16	66	0.491	3.6749	0.2326	2.0821	1.0893	8.4337
Dp16	71	0.1494	1.1723	0.092	0.5729	0.4332	17.3469
Dp16	152	1.1228	7.0145	0.9768	3.7392	2.262	13.9966
Dp16	48	0.2351	1.9891	0.2594	1.2082	0.6325	5.919
Dp16	136	0.6668	6.1254	1.6905	3.361	2.1233	3.3673
Dp16	15	0.1407	1.7246	0.1797	0.9089	0.5887	17.0588
Dp16	369	1.0435	6.2938	1.747	2.6878	2.269	21.0794
Dp16	82	0.5441	5.7631	0.8819	2.8282	1.9477	3.3088
Dp16	77	0.5653	5.104	0.3924	2.5863	1.591	13.5897
Dp16	130	0.5168	3.3452	0.7863	1.6218	1.3845	4.9313
Dp16	37	0.2058	2.9063	0.2939	1.6193	0.7712	12.4464
Dp16	160	0.8516	4.9733	1.8461	2.6566	2.2671	6.2288
Dp16	179	0.2669	5.0018	1.4292	2.1571	1.5275	2.7505
Dp16	141	0.5849	5.2729	0.5814	2.3982	1.3713	12.8696
Dp16	68	0.2049	2.0857	0.3101	0.9094	0.7631	8.5642
Dp16	108	1.4584	7.1582	1.7845	3.971	3.4898	9.086
Dp16	54	0.2711	4.5629	0.355	1.9902	1.213	0.6667
Dp16	140	0.7809	6.6075	1.0778	3.0192	2.3277	11.0754
Dp16	100	0.8223	8.1801	0.9803	4.9034	2.4512	6.4422
Dp16	484	1.1096	5.5174	1.8293	2.6183	1.5199	9.5127
Dp16	178	1.0258	5.2214	1.1702	2.957	1.788	10.2876
Dp16	297	1.4178	12.0693	2.6522	4.7872	3.2965	21.5049
Dp16	323	0.8209	8.6544	2.8407	4.1987	3.0283	17.8768
Dp16	69	1.5199	14.3875	1.4567	7.2414	5.6135	8.6887
Dp16	93	0.2361	2.2566	0.1986	1.1518	0.6891	13.879
Dp16	84	0.3636	5.3933	1.0325	2.3978	1.5896	4.3592
Dp16	159	0.2091	5.7271	1.2096	2.265	1.3807	0.2217
Dp16	88	0.4096	3.9925	1.1692	2.0779	1.4386	5.805
Dp16	49	0.1893	1.5191	0.1389	0.8682	0.5691	33.125
Dp16	98	0.2889	2.3331	0.7841	1.1041	0.8876	10.9218
Dp16	17	0.7472	4.4082	0.7442	1.7933	1.8407	16.6667
Dp16	88	0.886	8.5475	0.4134	4.2933	2.3486	6.3768
Dp16	117	0.4034	6.2102	1.0691	2.8993	1.8862	1.8771
Dp16	232	0.5804	5.3913	1.254	2.5281	1.5201	29.776
Dp16	197	1.4319	10.6061	2.1284	5.8139	3.2924	12.4302
Dp16	43	0.1328	2.3913	0.2293	1.0355	0.6847	0.3049
WT	25	0.5064	6.7811	0.2022	2.6695	2.4164	32.4742
WT	83	0.8772	8.2712	0.6514	3.6128	2.1421	6.9565
WT	52	0.8144	5.8805	0.6911	3.0134	1.961	8.7829
WT	84	1.3186	11.6285	2.5148	5.9196	4.0366	4.7395
WT	33	0.5703	8.3299	1.9619	3.9586	2.8109	2.3003
WT	31	0.5785	5.3897	0.7359	2.333	2.164	5.4254
WT	77	0.6346	7.2452	0.8511	3.1337	1.6607	13.9303
WT	30	1.0881	12.4658	0.3587	5.6695	0	20.8038
WT	4	0.614	5.7099	1.641	3.1596	2.3299	6.9886
WT	16	0.7035	13.0858	0.2075	6.3871	0	60.4938
WT	13	0.495	8.3506	0.3638	4.9014	2.3754	17.5824
WT	46	0.9928	12.1072	1.9518	5.5045	3.8047	4.3357
WT	55	0.4745	4.3894	1.204	2.1838	1.7129	1.4047
WT	29	0.2659	3.0088	0.2876	1.231	1.167	12.3016
WT	46	0.4575	4.2487	1.0533	2.2814	1.5226	42.2516
WT	168	0.749	4.2926	0.8141	2.1675	1.2832	8.6306
WT	82	0.3168	3.257	0.8406	1.3086	1.2036	3.1077
WT	52	0.8363	9.1418	0.3119	4.3826	0	14.7303
WT	24	1.021	9.2039	2.8029	5.3285	3.4997	6.6914
WT	61	1.4443	9.8854	0.5796	5.8627	0	15.2915
WT	85	0.6747	7.5256	1.0976	3.7988	1.562	4.1785
WT	72	1.2118	5.8581	0.8744	3.5896	2.3721	3.3524
WT	36	0.1644	1.9134	0.0962	0.7339	0.4948	49.4253
WT	67	0.9989	7.5789	0.8286	4.0277	2.296	6.1929
WT	56	1.4031	9.4417	0.5188	4.9189	0	30.625
WT	58	0.4561	3.9769	0.5846	2.2026	1.0571	2.6446
WT	54	0.2361	1.7622	0.1293	0.9336	0.4652	8.5938
WT	67	0.7704	4.9316	0.3302	2.6351	0	21.1382
WT	53	0.6459	6.3702	0.2613	3.5853	0	26.2537
WT	39	0.2551	2.6039	0.1149	1.3848	0	12
WT	73	1.6706	12.5637	0.862	6.4269	0	29.7321
WT	17	0.0923	1.1206	0.2061	0.6563	0.3551	26.8398
WT	52	0.3828	6.4662	1.0411	3.3706	1.8071	2.4288
WT	25	1.1336	15.9419	0.5056	8.9781	10.5664	20.1507
WT	48	0.5091	5.6475	0.7487	2.6959	1.6751	14.3201
WT	29	0.239	2.8055	0.3327	1.3272	0.8776	6.1785
WT	133	2.7745	16.9776	3.79	8.5045	6.2943	12.2675
WT	31	0.619	4.5439	0.3954	2.608	1.8796	28.6104
WT	71	0.5068	3.8476	0.6211	2.1237	1.2198	6.4972
WT	45	0.3486	4.2832	0.2559	2.2596	0	34.5912
WT	109	0.7021	7.514	2.2218	4.3151	2.3656	7.7145
WT	20	0.1753	1.6768	0.1455	0.911	0.5089	26.4865
WT	107	0.9385	5.5968	0.8404	3.2231	1.7739	0.8117
WT	53	1.2877	8.1834	0.5783	4.3039	0	14.1123
WT	72	0.7268	6.5347	0.9117	3.511	1.7568	13.0631
WT	49	1.7189	11.9127	2.6877	6.1718	4.0693	25.6239
WT	122	0.3852	2.9202	0.5401	1.187	0.9393	10.4478
WT	70	0.6282	5.6635	0.7269	3.1007	1.3545	8.7654
WT	63	0.6166	6.4415	0.6105	3.0363	0	1.9608
WT	45	0.5201	5.1176	0.8997	2.2313	1.6931	9.5319
WT	40	0.1481	1.4617	0.1011	0.7687	0.3743	9.7902
WT	99	0.9727	7.112	1.2247	3.7081	2.0227	35.2387
WT	140	1.2798	10.4998	2.6476	4.8847	3.1828	13.395
WT	53	0.5634	4.5292	0.4524	2.4449	0	8.6643
WT	88	0.9094	4.8009	0.453	2.8678	1.273	41.2564
WT	39	0.5461	10.4605	0.3016	4.252	0	9.2379
WT	76	0.9057	8.9184	1.6522	4.8172	2.4553	3.4131
WT	12	1.8345	15.0493	1.9963	8.8429	5.961	13.4535
WT	12	0.6226	7.9526	0.7279	4.6166	2.7455	3.6157
WT	65	0.6249	3.9392	0.3975	2.1955	0.886	12.6761
WT	56	0.2234	1.491	0.1258	0.7339	0.3336	6.962
WT	109	0.735	7.4795	2.3591	3.7485	2.7854	1.9273
WT	132	2.4473	12.0945	2.7476	7.8222	3.1884	17.8024
WT	27	0.3162	8.7568	0.6397	4.246	0	8.2759
WT	48	0.2085	1.8373	0.1444	0.9467	0.499	28.4404
WT	72	0.5697	4.0257	0.75	2.1372	1.9556	4.983
WT	92	1.1272	11.4237	0.9366	5.1385	0	5.5556
WT	51	0.9435	6.8917	0.8769	3.5894	1.8519	14.207
WT	53	0.7317	7.1991	1.075	3.6123	2.5795	4.6038
WT	160	0.9107	4.6749	0.5106	2.3003	1.2766	17.6259
WT	13	0.1277	2.6653	0.1638	1.4611	0.6684	11.4035
WT	115	1.0979	7.1779	1.4001	3.5172	2.2955	29.8534
WT	104	0.8346	5.1706	1.0029	2.5649	2.0295	8.6749
WT	89	0.7091	4.1104	0.8292	1.9532	1.462	16.7028
WT	90	1.2321	9.6047	0.68	3.7399	0	13.7042
WT	97	1.1795	9.3755	1.6491	4.6127	3.0085	40.7326
WT	130	2.3938	18.5946	3.2459	8.6166	4.9399	31.3566
WT	67	2.3548	15.8996	1.1418	9.1105	0	15.8318
WT	110	1.1171	5.2084	0.9798	2.772	2.4104	6.9048
WT	72	1.4531	8.3678	1.1044	4.2934	2.0072	18.0512
WT	68	1.2589	8.6191	0.5164	4.2944	0	25.5814
WT	88	0.3355	1.9602	0.2228	0.9586	0.4852	1.6736
WT	140	1.2533	11.8236	3.0165	6.2895	3.2684	5.9957
WT	60	0.7002	5.8547	0.4275	2.9255	0	35.7016
WT	78	1.5089	7.019	0.6239	3.8924	1.5938	16.6667
WT	94	0.3972	2.3236	0.5678	1.2543	0.7925	8.6478
WT	61	0.3586	3.0552	0.182	1.1428	0	26.6376
WT	109	1.3033	6.1565	0.8058	3.5716	1.5319	11.9497
WT	186	0.1743	1.7417	0.3721	0.6005	0.5429	32
WT	48	0.2052	1.9868	0.1834	0.8041	0.5922	28.0374
WT	81	0.6339	5.657	0.4718	2.4254	1.5012	17.0828
WT	31	0.4637	4.3017	0.4645	2.0154	1.5241	36.0248
WT	109	1.1077	11.801	3.0689	6.1333	2.7589	13.6877
WT	86	0.8459	7.0293	0.8255	3.5823	2.0359	7.3452
WT	37	0.5311	6.6454	0.7039	2.7716	2.1292	9.0287
WT	49	0.5707	6.6784	0.3955	2.9494	1.6422	4.9065
WT	135	0.7212	4.5531	1.2465	2.2314	1.7087	19.7689
WT	69	0.8624	8.1565	1.1326	3.6648	2.7334	6.6265
WT	69	0.4387	3.005	0.3147	1.4731	0	-6.8627
WT	44	0.7775	4.687	0.6786	2.3012	2.417	46.5682
WT	100	1.9915	10.3156	1.1592	4.9442	2.3224	52.4181
WT	113	1.6522	14.6726	2.3692	6.5951	3.4493	3.3124
WT	68	1.3402	16.6076	1.1645	6.1877	4.1779	17.2016
WT	104	1.3734	16.5489	4.0387	9.0198	4.8014	8.9384
WT	150	2.5287	10.969	2.9331	6.1334	4.6287	18.6277
WT	88	0.8679	7.6113	0.6178	3.2317	1.9249	8.5457
WT	32	2.6551	15.8826	2.6497	7.6863	6.637	25.5008
WT	110	0.4638	3.5595	0.7063	1.8737	1.1395	9.2541
WT	49	0.5006	4.8093	0.7679	1.823	2.0778	15.7233
WT	103	0.9215	13.0428	1.5741	4.5143	3.4301	11.1897
WT	89	0.7241	7.0334	1.4231	3.5452	1.8874	-0.7326
WT	49	0.8845	7.5551	0.4057	3.6342	0	5.0761
WT	73	0.8428	6.9031	2.031	3.901	2.5002	36.2955
WT	73	0.7758	3.7379	0.784	2.0386	1.2468	9.9394
WT	52	0.638	3.3417	0.6224	1.7461	1.5021	21.0926
WT	52	1.0755	7.3616	1.3305	3.9852	2.9412	4.9546
WT	60	1.1374	11.6262	1.0855	5.1894	3.2718	9.1228
WT	72	0.1607	1.3802	0.1245	0.5893	0.3612	9.3407
WT	63	1.892	18.8074	1.8512	8.1194	5.2532	16.8224
WT	62	0.1174	1.2011	0.3063	0.5332	0.4288	25.3886
WT	47	0.1473	1.6508	0.2829	0.6624	0.5514	9.2457
WT	188	1.0023	9.5685	2.7433	4.3329	3.1168	3.3311
WT	68	0.5262	4.8353	1.3666	2.3124	1.6107	3.4382
WT	79	0.1498	2.436	0.4044	1.0374	0.6555	3.2854
WT	103	0.177	1.0357	0.3455	0.5944	0.4033	16.0584
WT	59	0.9632	7.4202	1.2913	3.7879	2.5179	18.3079
WT	68	0.5607	4.0836	0.3293	2.077	0.8866	28.4932
WT	87	0.9132	5.1202	1.2703	2.8558	1.9376	26.3499
WT	173	1.4263	10.5085	2.3568	6.0466	2.7546	3.6963
WT	79	0.4472	3.8084	0.8587	2.0783	1.0684	3.1621
WT	62	0.5662	4.4113	0.4871	2.4673	1.3351	5.3241
WT	58	0.3998	2.9225	0.3855	1.3135	1.0245	30.6931
WT	56	1.1127	6.3316	1.4858	3.5886	2.1439	18.6331
WT	104	1.5385	7.0564	1.1531	3.7309	2.387	9.3643
WT	17	0.1628	2.791	0.1601	1.1256	0.677	1.5957
WT	141	1.1853	6.6711	1.8408	3.3155	3.0225	6.7544
WT	84	1.0969	10.2799	0.8767	4.8813	0	11.087
WT	79	1.4576	8.3606	0.7629	4.1641	2.4978	17.0077
WT	79	0.2837	2.7728	0.2176	1.0265	1.0404	17.004
WT	95	1.0685	9.3223	3.1936	5.0888	3.6293	7.3297
WT	57	1.2537	9.6752	1.0997	5.4404	3.9563	12.0435
WT	46	0.6543	4.993	0.2278	2.5485	0	5.7018
WT	31	0.0932	1.3524	0.055	0.6292	0.3802	25.6098
WT	76	0.7654	5.1256	0.5681	2.569	1.25	14.9533
WT	137	0.5893	5.2592	1.2324	2.7378	1.8765	17.6067
WT	44	0.8846	7.3181	0.8638	4.1601	2.3255	13.1108
WT	39	0.8887	6.016	0.7397	3.5832	2.3141	11.7196
WT	94	0.9565	10.2321	2.0976	5.6076	2.9704	10.8452
WT	95	0.7976	5.9233	0.8264	3.0893	1.5731	2.2814
WT	86	0.4798	3.3347	1.0258	2.0287	1.3336	1.2322
WT	46	0.3703	3.0543	0.2996	1.8013	0.8	11.9122
WT	132	0.5929	4.1069	0.8674	1.9326	1.3994	4.0658
WT	167	0.5441	3.2219	0.3954	1.5257	1.0164	7.3791
WT	119	0.4813	4.025	0.9586	1.5886	1.5475	7.1856
WT	76	0.3633	3.6469	0.576	1.2978	1.5155	19
WT	109	0.5073	2.8475	0.2368	1.436	0.913	13.4752
WT	130	1.008	7.1817	0.946	3.9044	1.8118	47.3098
WT	106	0.4098	4.0293	0.8882	2.3413	1.1963	14.7716
WT	18	0.1736	2.0826	0.1958	1.0983	0.5797	17.0686
WT	198	0.4853	6.166	1.6788	2.7955	2.0328	9.6056
WT	73	0.1848	2.2504	0.171	1.0433	0.6268	11.9497
WT	88	1.2007	8.2116	0.8368	5.0625	2.2217	14.8372
WT	113	0.3701	3.7089	0.6693	1.6176	1.1968	9.375
WT	206	0.4062	6.8702	1.9087	2.5846	2.3329	0.989
WT	76	1.5735	12.8715	2.4775	6.3013	4.3483	24.024
WT	99	0.4639	4.0685	0.3379	1.9227	1.1127	0.4769
WT	7	0.8383	6.0891	1.3156	3.2973	2.3888	7.638
WT	112	0.2764	2.0193	0.4886	1.1745	0.5923	-0.7449
WT	85	0.9481	9.1967	0.7539	3.8387	2.5456	41.6284
WT	203	1.1763	9.1162	1.096	3.9953	2.4668	10.4265
WT	59	0.4248	2.7953	0.2803	1.5683	1.0194	5.3333
WT	98	0.7726	5.361	1.3134	3.0845	1.8994	11.3548
WT	78	0.7253	3.3571	0.5909	1.6525	1.538	18.6047
WT	101	0.3454	2.3972	0.1472	1.1126	0.5886	16.7883
WT	87	0.4496	3.7111	0.8738	1.9169	1.552	3.9315
WT	7	0.3279	2.4347	0.2764	1.378	1.0156	31.4214
WT	234	0.3624	3.961	1.4517	1.7796	1.4826	2.1511
WT	10	0.2856	3.5615	0.256	1.9889	1.3357	1.3393
WT	137	0.954	5.323	0.8639	2.8239	2.4836	9.5604
WT	95	0.6532	6.3902	1.3719	2.9975	2.1133	5.9386
WT	94	1.4996	9.5259	2.9057	5.425	3.9858	28.5821
WT	111	0.6872	6.7289	1.1121	3.1404	1.9537	6.4869
WT	87	0.7203	4.6949	0.7922	2.7145	1.4916	5.4479
WT	95	0.8227	4.0318	0.446	2.3697	0.9943	20.0864
WT	203	0.2056	1.6961	0.4777	0.8368	0.5079	20.6693
WT	122	0.9085	6.1215	1.3588	3.315	2.1619	14.2741
WT	66	0.8216	7.9647	0.5222	3.3778	2.1566	17.1306
WT	67	0.462	4.609	0.4474	2.0722	1.5275	11.6057
WT	62	0.2349	1.8063	0.2088	1.0209	0.686	28.6195
WT	66	0.3176	2.0791	0.1854	1.1325	0.6649	10.4839
WT	14	0.1381	1.4928	0.0692	0.8095	0.6909	49.4737
WT	68	0.3405	2.7848	0.1501	1.7269	0.9898	15.4472
WT	55	0.8687	7.708	0.3998	3.9246	2.6846	31.0606
WT	55	0.3389	3.6296	0.1638	1.9324	0	12.2093
WT	74	1.751	8.7618	1.8499	4.9533	3.7221	9.9912
WT	217	2.1666	10.6585	1.9155	5.2479	2.5907	30.7029
WT	78	1.0792	10.8647	0.8659	6.4283	2.4276	5.6358
WT	96	1.192	8.053	0.933	4.6726	2.4305	12.4088
WT	64	0.4476	6.0429	0.4339	2.5513	1.6031	12.9893
WT	40	0.2369	3.7273	0.5829	1.4986	1.2736	3.6923
WT	252	1.3708	9.5559	2.8615	4.7081	3.3908	9.9126
WT	14	0.1154	1.2216	0.1741	0.6089	0.422	25.5474
WT	54	0.8939	8.5337	0.8853	3.0245	3.4858	5.8706
WT	242	1.2327	6.8634	1.3122	2.9493	3.2172	6.1677
WT	96	1.6882	14.9014	3.0267	7.2625	5.6421	19.8738
WT	22	0.7042	4.838	0.8754	2.6301	1.9995	28.2456
WT	162	1.293	10.4212	1.6526	5.2155	2.6948	35.6654
WT	327	2.6942	12.0571	3.0586	6.1501	3.5328	9.9629
WT	99	0.3583	2.2804	0.1749	1.2338	0.5752	35.6784
WT	48	0.7221	12.9707	0.5336	6.7051	0	3.6609
WT	82	0.6325	7.5633	1.7965	3.3887	2.681	4.6957
WT	139	1.3637	11.3093	0.9496	5.5785	2.9324	12.6704
WT	19	0.1446	1.3362	0.1026	0.6557	0.5139	24.7706
WT	99	1.0537	11.2526	1.2946	5.2075	2.8807	8.5312
WT	233	1.1511	10.4143	2.5826	4.5017	3.8036	22.6543
WT	167	2.5426	12.2536	4.2429	6.1499	5.4584	12.8725
WT	174	0.9752	9.3998	2.568	4.5659	3.2641	6.1252
WT	9	0.4672	6.0108	1.1819	3.2031	1.9339	9.0171
WT	141	0.1918	3.0472	0.2887	1.1936	0.9073	1.5015
WT	9	0.2651	9.9136	0.3585	6.4374	2.0276	7.4227
WT	151	0.2488	2.4789	0.3729	1.1588	0.6755	-0.627
WT	159	0.4952	6.9964	1.3118	2.7961	2.0193	10.545
WT	121	0.6834	7.5251	0.3995	3.6046	1.6681	6.8602
WT	54	0.1317	1.2176	0.1327	0.6434	0.3795	3.2
WT	193	0.6893	5.0312	0.5706	2.5564	1.2541	5.104
WT	164	0.5268	5.9716	0.8798	2.6908	1.932	3.5032
WT	110	0.4224	4.8419	1.1752	1.9303	1.6669	11.4865
WT	72	0.5897	5.6551	0.3034	2.8775	2.4741	24.5353
WT	47	0.1419	1.4001	0.2739	0.7209	0.5126	5.0955
WT	165	0.5042	11.5141	2.5436	4.5009	3.1227	2.2769
WT	24	0.1681	1.6852	0.1702	0.9327	0.6226	10.0877
WT	113	1.3365	7.4169	1.334	3.6428	2.9324	25.2275
WT	147	2.2084	11.7064	1.8677	5.6976	5.2626	24.7235
WT	79	0.3605	3.5235	0.1341	1.5819	0	33.3333
WT	227	0.3486	3.2478	0.526	1.3364	0.8272	0.6
WT	37	0.1564	1.3003	0.1706	0.6689	0.4921	25.8706
WT	27	0.1571	2.8616	0.2797	1.5546	0.7892	0.4545
WT	8	0.0923	1.8159	0.049	1.1004	0.4989	32.3944
WT	41	0.8714	7.5882	0.7794	4.269	2.732	8.5447
WT	29	0.8507	7.4811	0.6527	3.9211	2.6509	11.1952
WT	36	0.1157	1.3281	0.128	0.5498	0.4412	3.268
WT	32	0.5041	3.9372	0.4966	2.1762	1.4696	5.4152
WT	69	0.3799	3.7178	0.1615	1.8285	1.4075	28.7879
WT	87	0.586	4.2184	0.4132	1.6838	2.1643	7.5802
WT	181	1.2504	7.3061	0.602	3.86	1.7267	19.0317
WT	114	0.6964	6.2444	0.4019	3.0445	0	11.6223
WT	250	0.8497	10.8707	3.3563	5.2886	3.5591	-0.4283
WT	363	1.237	8.1736	2.0493	3.5395	2.2147	24.1929
WT	14	0.2672	3.591	0.1318	2.1266	1.0291	6.5693
WT	292	0.935	6.8479	1.0618	3.064	2.2641	3.6939
WT	103	0.5944	7.6434	0.8921	4.0034	2.415	3.1683
WT	343	0.7069	6.24	1.8709	2.638	2.2609	3.7111
WT	47	1.2484	13.3517	1.2602	5.0649	4.8799	16.7724
WT	31	0.352	4.3619	0.1959	2.4113	1.3693	25.4902
WT	130	1.406	14.5001	0.7785	6.163	0	14.6667
WT	82	0.7615	7.417	0.8059	3.46	2.307	4.3796

## Sheet: Figure 1E
Group	Directionality					Directionality
Dp16	0.8816			Dp16	avg.	0.566563
Dp16	0.8694				SEM	0.0265024
Dp16	0.8013			WT	avg.	0.513227
Dp16	0.2673				SEM	0.0315297
Dp16	0.2614
Dp16	0.3523				pvalue	0.188961
Dp16	0.8588
Dp16	0.8665			Dp16	min	0.0124
Dp16	0.8485			Dp16	Q1	0.34685
Dp16	0.6567			Dp16	median	0.5435
Dp16	0.8334			Dp16	Q3	0.849
Dp16	0.199			Dp16	Max	1
Dp16	0.924
Dp16	0.1659			WT	min	0.0007
Dp16	0.9741			WT	Q1	0.25725
Dp16	0.887			WT	median	0.55735
Dp16	0.9572			WT	Q3	0.796625
Dp16	0.8878			WT	Max	1
Dp16	0.4431
Dp16	0.9216
Dp16	0.3556
Dp16	0.2024
Dp16	0.9075
Dp16	0.483
Dp16	0.5899
Dp16	0.5292
Dp16	0.2931
Dp16	0.3131
Dp16	1
Dp16	0.5138
Dp16	0.3368
Dp16	0.9005
Dp16	0.1131
Dp16	0.0124
Dp16	0.4559
Dp16	0.9345
Dp16	0.0751
Dp16	0.834
Dp16	0.7048
Dp16	0.4108
Dp16	0.2093
Dp16	0.0888
Dp16	0.3261
Dp16	0.8039
Dp16	0.8708
Dp16	0.8425
Dp16	0.8051
Dp16	0.9939
Dp16	0.8495
Dp16	0.4463
Dp16	0.3739
Dp16	0.731
Dp16	0.6131
Dp16	0.9793
Dp16	0.0133
Dp16	0.8092
Dp16	0.4696
Dp16	0.9136
Dp16	0.5422
Dp16	0.4002
Dp16	0.8502
Dp16	0.023
Dp16	0.452
Dp16	0.45
Dp16	0.1003
Dp16	0.7946
Dp16	0.1675
Dp16	0.0794
Dp16	0.6028
Dp16	0.8757
Dp16	0.6487
Dp16	0.9013
Dp16	0.634
Dp16	0.1738
Dp16	0.8604
Dp16	0.9074
Dp16	0.4174
Dp16	0.8024
Dp16	0.4519
Dp16	0.7959
Dp16	0.4207
Dp16	0.7323
Dp16	0.1847
Dp16	0.9878
Dp16	0.3766
Dp16	0.3878
Dp16	0.3814
Dp16	0.766
Dp16	0.0489
Dp16	0.5529
Dp16	0.6493
Dp16	0.9578
Dp16	0.6254
Dp16	0.4986
Dp16	0.8201
Dp16	0.4161
Dp16	0.5015
Dp16	0.3575
Dp16	0.7943
Dp16	0.492
Dp16	0.2166
Dp16	0.8611
Dp16	0.8664
Dp16	0.9201
Dp16	0.4272
Dp16	0.2609
Dp16	0.8261
Dp16	0.7881
Dp16	0.3855
Dp16	0.066
Dp16	0.3247
Dp16	0.1573
Dp16	0.3095
Dp16	0.5435
Dp16	0.9235
Dp16	0.3414
Dp16	0.4198
Dp16	0.3289
Dp16	0.61
WT	0.7974
WT	0.6587
WT	0.0265
WT	0.2097
WT	0.0748
WT	0.5654
WT	0.8661
WT	0.0026
WT	0.2987
WT	0.9809
WT	0.4594
WT	0.2237
WT	0.0825
WT	0.0817
WT	0.5696
WT	0.9278
WT	0.4316
WT	0.2699
WT	0.309
WT	0.6414
WT	0.6802
WT	0.7728
WT	0.8376
WT	0.794
WT	0.037
WT	0.6869
WT	0.8692
WT	0.4165
WT	0.3425
WT	0.8977
WT	0.236
WT	0.3698
WT	0.8166
WT	0.0198
WT	0.0395
WT	0.4469
WT	0.914
WT	0.8349
WT	0.5053
WT	0.7671
WT	0.6586
WT	0.1359
WT	0.4293
WT	0.5257
WT	0.835
WT	0.9308
WT	0.9593
WT	0.9412
WT	0.5734
WT	0.0593
WT	0.6352
WT	0.2876
WT	0.6018
WT	0.5628
WT	0.3805
WT	0.3867
WT	0.0431
WT	0.6144
WT	0.689
WT	0.9514
WT	0.1416
WT	0.2577
WT	0.9042
WT	0.5519
WT	0.519
WT	0.6921
WT	0.3222
WT	0.0357
WT	0.0305
WT	0.0756
WT	0.1684
WT	0.7955
WT	0.3727
WT	0.1289
WT	0.8287
WT	0.3711
WT	0.8
WT	0.7051
WT	0.4267
WT	0.062
WT	0.6822
WT	0.9933
WT	0.0007
WT	0.2571
WT	0.1939
WT	0.3195
WT	0.4948
WT	0.9299
WT	0.8637
WT	0.8396
WT	0.3328
WT	0.6249
WT	0.9047
WT	0.9573
WT	0.6314
WT	0.797
WT	1
WT	0.6505
WT	0.6257
WT	0.7754
WT	0.0255
WT	0.0891
WT	0.4885
WT	0.6393
WT	0.5285
WT	0.1236
WT	0.6555
WT	0.8337
WT	0.8796
WT	0.165
