# Supplementary material for: Alterations of in vivo CA1 network activity in Dp(16)1Yey Down syndrome model mice
Source: eLife. 2018 Feb 27;7:e31543. doi: 10.7554/eLife.31543 (PMC5841929; doi:10.7554/eLife.31543)
Supplement: Figure 3—source data 1. [file elife-31543-fig3-data1.xlsx]

## Sheet: Sheet1
Group	Peak firing rate (Hz)	Mean firing rate (Hz)	Complex spiking index	Inter-spike interval mode (ms)					Peak firing rate (Hz)	Mean firing rate (Hz)	Complex spiking index	Inter-spike interval mode (ms)
Dp16	2.42237	0.147317	18.1507	9.308			Dp16	avg.	12.8925	0.733715	8.25382	9.03565
Dp16	0.068422	0.032793	3.07692	7.25				SEM	0.867967	0.0495116	0.54061	1.73489
Dp16	0.789304	0.239642	7.36842	10.506			WT	avg.	12.2651	0.619904	13.3508	5.32482
Dp16	0.77306	0.225516	1.566	12.564				SEM	0.987239	0.0475346	0.781725	0.168008
Dp16	0.479355	0.114524	2.20264	6.758
Dp16	1.4357	0.386454	19.4517	8.387				pvalue	0.225934	0.202849	1.80934e-07	3.16807e-12
Dp16	0.313883	0.108974	5.55556	7.895
Dp16	8.77464	0.692187	27.2198	8.786			Dp16	min	0.045754	0.024008	-5.92105	0.953
Dp16	9.03221	0.337517	0.44843	7.68			Dp16	Q1	1.49594	0.192688	2.1612	4.608
Dp16	15.9437	1.68254	17.2259	8.141			Dp16	median	7.68377	0.421455	5.61224	5.591
Dp16	2.12228	0.454563	0.554939	18.77			Dp16	Q3	20.321	0.963825	12.0468	7.8335
Dp16	11.483	0.80772	0.62461	16.435			Dp16	Max	68.3846	5.66627	43.6893	46.817
Dp16	3.75497	0.593808	10.7901	7.281
Dp16	2.99059	0.296652	3.06122	15.636			WT	min	0.109927	0.037976	-3.93258	0.921
Dp16	0.280879	0.109983	27.5229	13.394			WT	Q1	1.4304	0.195381	4.88084	4.178
Dp16	0.208316	0.059571	-1.81818	4.362			WT	median	4.96144	0.381502	9.07566	4.639
Dp16	1.30246	0.209581	20.9302	4.27			WT	Q3	18.4841	0.735567	18.0228	5.376
Dp16	31.6082	0.525306	1.85567	8.694			WT	Max	99.104	5.8893	61.6162	30.597
Dp16	35.3648	0.544802	16.2028	4.239
Dp16	1.43424	0.3558	1.06545	3.932
Dp16	2.79266	0.370964	19.4161	5.591
Dp16	0.941052	0.158675	1.70649	4.608
Dp16	0.628198	0.144595	5.99251	4.577
Dp16	1.08752	0.212289	5.61224	4.7
Dp16	8.58748	0.291897	15.3989	7.25
Dp16	1.10942	0.168423	4.82315	3.963
Dp16	24.4216	0.9136	2.8436	5.468
Dp16	9.66434	0.274026	19.9605	4.086
Dp16	0.702281	0.138638	13.2812	4.209
Dp16	31.1515	2.66498	0.528026	7.434
Dp16	4.49949	0.295146	8.07339	5.161
Dp16	12.4011	0.513392	5.6962	4.7
Dp16	38.5245	2.18408	14.0094	6.175
Dp16	58.1762	5.66627	15.622	12.841
Dp16	28.8577	1.00241	0.432199	4.823
Dp16	1.06994	0.268069	11.3131	4.792
Dp16	0.136091	0.043324	16.25	4.884
Dp16	0.684993	0.105603	10.7692	5.683
Dp16	0.692921	0.134847	-4.01606	17.019
Dp16	2.50999	0.306519	11.8375	3.84
Dp16	3.5267	0.330889	4.90998	10.076
Dp16	0.541087	0.128348	-1.26582	7.987
Dp16	4.85684	0.654737	3.14309	4.608
Dp16	1.39436	0.178171	5.77508	4.393
Dp16	2.30382	0.329264	3.45395	5.161
Dp16	5.38567	0.593	-2.55708	4.024
Dp16	4.17706	0.958549	-0.338983	8.11
Dp16	2.56965	0.500936	0.324324	14.039
Dp16	15.5138	1.58838	2.72758	5.376
Dp16	0.462205	0.118059	1.83486	13.947
Dp16	1.1699	0.129973	0	5.899
Dp16	1.59311	0.359591	0.60241	5.038
Dp16	3.15913	0.262653	8.24742	5.745
Dp16	21.3344	1.8402	4.23779	4.27
Dp16	22.2887	1.49848	39.5374	3.963
Dp16	0.754574	0.134305	3.22581	4.393
Dp16	5.93249	0.41158	12.6316	4.7
Dp16	10.5395	1.13293	14.1013	3.932
Dp16	1.36776	0.15705	21.7241	4.577
Dp16	6.81795	1.19521	42.2293	4.608
Dp16	2.30845	0.306519	10.424	4.178
Dp16	11.2227	0.512851	26.7159	4.27
Dp16	13.3786	0.68019	12.2611	4.547
Dp16	3.03922	0.399124	15.3324	3.748
Dp16	12.0834	3.30564	3.26016	5.714
Dp16	12.4267	0.789043	4.46122	6.789
Dp16	48.9186	2.80254	2.62802	6.144
Dp16	10.2578	1.0674	11.8214	7.342
Dp16	7.47589	0.170488	10.2484	28.908
Dp16	0.715899	0.126013	9.2437	4.7
Dp16	0.160407	0.041298	1.28205	5.867
Dp16	31.3845	2.51973	-0.125971	20.982
Dp16	42.0009	2.16922	2.31877	13.517
Dp16	8.7563	0.354213	2.09268	4.055
Dp16	0.178598	0.056653	21.4953	3.594
Dp16	0.176605	0.06936	-3.05343	4.976
Dp16	0.54636	0.086303	4.90798	5.007
Dp16	0.370872	0.1096	-1.93237	7.004
Dp16	12.1757	0.212845	16.6667	4.639
Dp16	2.88429	0.574471	0	21.412
Dp16	0.135795	0.047122	4.49438	5.069
Dp16	12.0373	0.285382	-0.556586	6.604
Dp16	3.04651	0.142426	-2.60223	9.493
Dp16	4.92134	0.877326	9.29391	6.144
Dp16	4.56413	1.21618	0.217581	33.423
Dp16	3.53754	0.231906	32.6484	5.253
Dp16	6.31008	0.213375	18.6104	5.007
Dp16	35.6772	0.782551	11.3667	4.055
Dp16	0.115248	0.052417	2.0202	7.035
Dp16	0.283804	0.081233	7.33333	455.055 (excluded outlier)
Dp16	19.4497	0.421455	12.8141	4.516
Dp16	15.4032	0.499287	27.6776	3.686
Dp16	23.5643	0.851382	11.6915	11.612
Dp16	10.8696	0.309738	6.83761	11.858
Dp16	1.14126	0.28803	14.1544	4.055
Dp16	5.36815	0.491345	2.90948	9.953
Dp16	22.1054	1.87113	7.4095	4.639
Dp16	27.2774	2.40801	3.05562	6.359
Dp16	6.24229	0.194844	29.3478	5.038
Dp16	0.79527	0.156193	4.0678	5.038
Dp16	52.4512	3.63214	11.4444	6.113
Dp16	32.8878	2.56474	21.4448	4.362
Dp16	21.5052	0.445811	4.51306	5.192
Dp16	1.20511	0.141897	23.1343	3.533
Dp16	1.20445	0.18849	5.89888	5.038
Dp16	33.068	2.11469	5.57918	5.806
Dp16	0.256248	0.080479	-5.92105	4.638
Dp16	8.77454	0.703131	0.451807	10.475
Dp16	11.8919	0.379098	15.5028	4.946
Dp16	21.4112	0.967864	4.32166	11.274
Dp16	49.7017	0.818555	5.36869	8.202
Dp16	27.0889	0.328799	7.40741	4.301
Dp16	48.7499	3.46271	8.45436	5.161
Dp16	3.42155	0.290148	5.10018	4.608
Dp16	8.48599	0.445811	17.1021	4.608
Dp16	38.1756	1.56775	9.14614	5.837
Dp16	17.9823	0.261556	13.1579	4.362
Dp16	7.36213	0.062477	11.0169	4.332
Dp16	21.5669	2.14434	13.6296	3.871
Dp16	11.366	0.147721	6.45161	32.932
Dp16	0.168611	0.055064	-1.92308	1.168
Dp16	41.6048	0.085774	-0.617284	3.318
Dp16	31.046	2.23594	8.99834	5.683
Dp16	4.00019	0.300737	1.23239	17.633
Dp16	5.67257	0.278499	26.8061	6.451
Dp16	4.95319	0.060359	9.64912	3.686
Dp16	4.11043	0.366391	15.6069	6.543
Dp16	0.176417	0.05983	3.53982	3.441
Dp16	0.188827	0.085244	0	5.284
Dp16	15.0197	0.818025	16.3754	4.147
Dp16	28.9187	2.5605	7.19603	4.393
Dp16	15.1284	1.03987	1.27162	8.878
Dp16	2.29793	0.282206	-2.81426	1.045
Dp16	9.60668	1.29402	-0.368249	6.144
Dp16	0.317194	0.102716	1.03093	0.953
Dp16	12.8289	0.430456	8.73309	4.147
Dp16	37.0613	1.99503	2.11977	5.161
Dp16	28.7289	0.959393	2.42826	9.093
Dp16	4.0202	0.666069	-0.397456	13.455
Dp16	14.823	0.731722	6.58466	5.499
Dp16	7.80724	0.295972	5.36673	33.669
Dp16	6.35889	0.431515	12.0245	4.547
Dp16	0.705854	0.153016	14.1869	17.326
Dp16	16.3312	0.477049	5.4384	21.166
Dp16	0.202525	0.04977	21.2766	16.865
Dp16	1.15908	0.256262	3.09917	5.591
Dp16	28.7596	0.103775	2.55102	6.605
Dp16	18.9579	0.412454	3.33761	9.247
Dp16	54.7895	0.972494	15.2198	5.591
Dp16	26.5763	1.66217	9.09675	6.083
Dp16	7.68377	1.53439	22.9965	7.68
Dp16	36.4221	1.58678	31.6498	5.468
Dp16	5.70225	0.467802	-3.08571	4.731
Dp16	68.3846	1.33123	1.96	5.468
Dp16	55.014	0.56457	-0.188857	5.929
Dp16	38.92	2.61007	9.13373	5.929
Dp16	6.03951	0.817985	34.1607	5.161
Dp16	1.3537	0.237376	30.6306	5.253
Dp16	25.027	0.788581	3.45763	8.663
Dp16	19.2689	1.02328	6.2435	7.434
Dp16	0.980621	0.198883	22.252	5.13
Dp16	9.5518	0.462456	2.30947	6.359
Dp16	40.2234	1.12914	12.8314	5.867
Dp16	2.15013	0.415408	8.74036	4.27
Dp16	0.949132	0.141143	4.92424	5.714
Dp16	14.1193	1.27028	1.30362	6.021
Dp16	1.83165	0.189794	19.4366	5.038
Dp16	38.7424	1.84394	10.4287	4.393
Dp16	10.7304	0.406319	6.96452	5.13
Dp16	17.2147	0.689674	7.75194	6.175
Dp16	2.66007	0.258227	6.41822	4.854
Dp16	17.6392	0.728167	6.60793	5.714
Dp16	1.55618	0.295116	1.26812	17.818
Dp16	26.5393	0.141677	5.66038	9.308
Dp16	21.4584	1.80598	3.81657	9.738
Dp16	1.02851	0.29672	3.6036	7.772
Dp16	2.08292	0.27587	6.97674	5.683
Dp16	5.13871	0.691278	-1.00464	8.141
Dp16	5.374	0.538908	3.1746	7.711
Dp16	2.51553	0.57152	1.49673	9.554
Dp16	20.0207	1.24836	0.427716	9.062
Dp16	0.863584	0.179636	-0.296736	6.298
Dp16	16.4315	0.998156	12.5335	5.929
Dp16	0.997465	0.349114	1.53139	4.915
Dp16	7.94719	2.04657	7.4837	5.376
Dp16	4.38173	0.829213	-0.83709	5.53
Dp16	12.9283	1.54081	3.19223	7.68
Dp16	9.1813	0.51378	-0.831601	4.915
Dp16	5.47755	0.578471	9.79667	5.714
Dp16	7.09654	1.12219	3.00143	5.806
Dp16	0.787907	0.218129	0	6.574
Dp16	25.6196	1.23874	3.02115	5.437
Dp16	1.79508	0.349114	0.765697	6.697
Dp16	31.6638	1.99431	24.3459	6.912
Dp16	55.1558	2.49724	23.1141	3.625
Dp16	3.72039	0.192764	16.5414	4.486
Dp16	23.2423	0.550271	9.3942	9.001
Dp16	23.1325	1.16431	-0.248653	22.917
Dp16	0.125447	0.025122	15.3846	4.332
Dp16	6.54736	0.137689	5.26316	7.957
Dp16	0.252017	0.056042	12.069	1.598
Dp16	25.4605	0.072468	6	6.605
Dp16	20.5124	1.60492	10.5358	4.27
Dp16	0.226897	0.057008	7.62712	3.778
Dp16	0.70761	0.116915	27.6859	4.7
Dp16	0.980012	0.095657	4.0404	5.929
Dp16	8.08521	0.264749	8.90909	5.284
Dp16	19.2026	1.20635	0.961153	14.469
Dp16	16.6	0.188899	6.39386	5.407
Dp16	21.5238	1.259	4.835	9.062
Dp16	19.5169	0.535295	2.07394	8.94
Dp16	1.7678	0.226099	1.92308	6.021
Dp16	2.89689	0.348328	43.6893	6.113
Dp16	12.0902	0.055075	25.4386	3.994
Dp16	36.517	1.04402	16.8441	4.516
Dp16	2.00041	0.17199	0.842697	4.977
Dp16	4.78227	0.534811	0.722674	8.233
Dp16	45.0406	2.61415	6.80096	4.27
Dp16	21.7586	1.29041	2.43355	4.393
Dp16	18.163	0.57636	7.29254	3.994
Dp16	9.52758	0.597134	3.15279	5.192
Dp16	16.3462	0.387461	8.60349	8.725
Dp16	0.557729	0.079231	7.31707	4.208
Dp16	17.0227	0.44012	2.85088	4.731
Dp16	19.9955	0.618391	19.0476	3.748
Dp16	24.4833	0.302432	12.8981	5.038
Dp16	2.43378	0.157496	4.60123	3.809
Dp16	21.5075	0.773472	4.24735	12.933
Dp16	17.9355	0.855119	5.76271	4.731
Dp16	2.94001	0.385528	2.75689	4.731
Dp16	36.3581	0.870095	10.4329	7.68
Dp16	21.6814	0.366686	13.9474	20.613
Dp16	22.6076	1.0759	4.39462	4.178
Dp16	19.8839	0.734822	8.34977	10.936
Dp16	20.1296	1.21408	2.70593	4.823
Dp16	14.1866	0.810189	4.94931	6.267
Dp16	3.17319	0.158946	11.5502	6.052
Dp16	0.492732	0.067114	7.31707	6.113
Dp16	18.8039	1.8039	2.87356	4.393
Dp16	26.2673	0.92541	0.235849	11.827
Dp16	7.20575	0.959786	-1.41965	46.817
Dp16	37.3275	2.88263	1.81337	5.376
Dp16	37.0517	2.89354	22.5721	4.977
Dp16	1.88083	0.404867	24.7978	4.946
Dp16	35.0433	1.73624	2.35627	7.342
Dp16	5.63722	0.620396	2.55057	6.052
Dp16	15.6362	1.12784	-1.79003	6.175
Dp16	13.2473	1.91793	1.28023	8.141
Dp16	21.5835	0.663502	4.6875	6.267
Dp16	10.6225	0.754078	3.97686	5.376
Dp16	57.7252	2.67474	3.97797	6.574
Dp16	8.44984	0.679871	3.21027	5.591
Dp16	1.12736	0.212255	5.65553	4.792
Dp16	2.65943	0.238992	23.0594	4.7
Dp16	0.045754	0.024008	29.5455	4.147
Dp16	0.610389	0.126589	5.60345	5.038
Dp16	19.4936	2.48759	2.82895	12.134
Dp16	21.0921	0.747531	1.09489	3.963
Dp16	0.723484	0.225351	6.77966	5.1
Dp16	0.889306	0.192612	4.24929	8.356
Dp16	0.708953	0.205707	5.83554	7.65
Dp16	7.84278	0.293556	5.57621	18.186
Dp16	7.20575	0.838107	11.6536	5.499
WT	23.1796	1.12915	43.0921	4.362
WT	7.11263	0.671759	40.4423	4.639
WT	11.7901	0.099225	1.06952	6.789
WT	31.7094	0.122041	11.3043	4.762
WT	1.43545	0.126817	2.09205	3.625
WT	2.70259	0.415472	-0.893997	4.577
WT	0.420716	0.062613	11.0169	4.209
WT	10.7885	0.403268	7.23684	4.393
WT	2.22122	0.194205	5.46448	4.086
WT	12.4501	0.952454	-0.557103	3.84
WT	2.58472	0.238777	8.44444	4.27
WT	5.00896	0.632493	1.76174	4.086
WT	31.2533	0.56935	-2.7959	21.074
WT	32.8605	0.391063	8.41248	3.379
WT	65.0345	5.8893	24.5473	4.055
WT	3.35821	0.479145	8.30565	3.932
WT	0.405144	0.104001	11.7347	4.577
WT	9.22315	0.844209	29.2269	4.178
WT	10.519	0.761963	18.0362	9.431
WT	0.689865	0.167144	16.1905	5.253
WT	4.96923	0.631432	3.94958	5.099
WT	0.878223	0.115674	26.6055	7.618
WT	2.0775	0.401676	13.8705	5.376
WT	3.7887	0.261593	6.28803	4.639
WT	5.76959	0.497717	11.5139	5.038
WT	10.61	0.239838	20.5752	4.608
WT	6.9815	0.796453	3.46436	5.929
WT	53.4609	4.52721	50.6966	3.625
WT	33.8126	2.04287	26.9051	3.717
WT	29.5024	0.4489	10.6383	18.647
WT	15.367	0.521064	17.7189	4.485
WT	1.80516	0.254695	5.625	4.147
WT	2.48983	0.530085	33.3333	5.284
WT	0.882366	0.28089	6.95187	4.639
WT	1.8451	0.600835	25.8333	4.946
WT	24.0318	2.65218	13.0262	3.963
WT	4.59016	0.271878	3.49908	6.574
WT	32.415	1.04195	14.9161	5.161
WT	1.09526	0.156718	6.70927	4.854
WT	23.4486	0.977858	4.44104	4.178
WT	10.6448	0.857191	6.95094	4.239
WT	0.876649	0.185257	21.8919	4.761
WT	5.18355	0.501697	28.1437	4.086
WT	14.3893	0.731516	9.42623	4.7
WT	37.1303	0.617858	1.21556	4.7
WT	32.0336	0.307427	6.01626	5.683
WT	22.7942	1.44751	12.0636	5.161
WT	21.6964	0.404562	5.69307	5.407
WT	6.00006	0.67694	10.8728	4.362
WT	28.9531	1.28128	4.92188	6.052
WT	0.28268	0.092629	0	4.331
WT	96.661	0.900751	5.89216	4.823
WT	0.309213	0.108651	9.21659	4.823
WT	0.693972	0.162726	7.07692	5.929
WT	29.0276	0.16573	2.71903	4.239
WT	3.00421	0.381029	4.59921	5.806
WT	1.7097	0.291405	3.60825	17.664
WT	99.104	0.821641	20.0488	4.147
WT	7.9788	0.434604	5.60641	4.27
WT	4.59302	0.169736	5.60472	30.597
WT	0.196634	0.063088	3.1746	7.588
WT	13.7348	1.2963	1.96987	5.222
WT	1.27487	0.114159	17.9825	4.792
WT	55.0411	1.04345	1.39156	4.516
WT	0.65486	0.156718	15.3355	4.608
WT	20.992	1.02893	2.57908	5.591
WT	19.9652	1.43499	25.157	4.055
WT	1.71027	0.393046	22.6752	4.67
WT	1.32557	0.299917	49.0818	4.332
WT	18.3503	0.414075	1.08827	5.314
WT	41.504	0.773074	5.50518	5.437
WT	0.245427	0.053074	15.0943	4.946
WT	24.2916	1.18965	12.9941	4.516
WT	3.0967	0.486676	0.411523	6.943
WT	2.58921	0.31644	6.48734	6.697
WT	14.9918	0.861697	9.87798	3.533
WT	17.5956	0.415077	3.61882	4.946
WT	4.14989	0.662921	3.09668	5.837
WT	41.7182	0.899249	7.90646	4.147
WT	2.24723	0.409569	10.2689	15.729
WT	18.5287	1.64929	7.6176	4.331
WT	15.7849	0.643894	7.69829	6.758
WT	0.561261	0.187761	11.2	4.424
WT	3.57515	0.553769	9.31284	4.516
WT	16.6296	0.946815	9.46089	5.069
WT	0.561532	0.159221	4.40252	11.397
WT	21.5154	0.970348	36.1713	3.748
WT	1.64241	0.339972	20.0295	4.055
WT	5.03003	0.648901	35.108	3.932
WT	3.28706	0.498192	28.8442	4.086
WT	5.72698	0.706982	42.4221	4.393
WT	11.2281	0.624868	47.9167	3.809
WT	25.5771	1.77747	7.54505	4.178
WT	31.1199	1.83956	40.5553	3.84
WT	1.33239	0.278387	32.1942	4.823
WT	4.95364	0.56879	18.1338	4.454
WT	2.72204	0.336467	11.3095	4.27
WT	19.2197	0.810626	13.3951	4.147
WT	0.498914	0.089624	27.3743	4.608
WT	11.9414	0.897747	16.2856	3.717
WT	0.469943	0.131683	18.251	4.485
WT	0.109927	0.060584	8.26446	2.734
WT	0.366491	0.083115	22.8916	5.253
WT	0.756791	0.140195	5.71429	5.929
WT	28.2159	1.20668	33.1398	3.625
WT	5.10467	0.775577	12.7179	4.055
WT	0.568425	0.159221	23.8994	4.823
WT	0.968825	0.233324	2.7897	7.588
WT	0.242353	0.071145	5.40541	8.233
WT	0.454926	0.091815	4.71204	4.086
WT	6.45438	0.304768	1.73502	4.055
WT	8.34977	0.575887	6.42202	7.311
WT	21.3601	0.363895	6.34082	4.731
WT	16.6555	0.687411	7.9021	5.284
WT	29.3784	1.9435	2.69602	4.024
WT	16.2652	1.3181	2.84464	3.717
WT	3.43092	0.164402	5.26316	4.393
WT	0.288379	0.044706	13.9785	3.81
WT	1.06952	0.198532	11.3527	3.103
WT	6.12838	0.16969	3.96601	3.748
WT	26.7977	0.835469	4.66053	4.301
WT	0.763387	0.175458	4.93151	9.922
WT	18.8453	1.02054	3.86246	4.454
WT	0.609203	0.098545	3.41463	6.697
WT	0.161605	0.049994	-3.84615	1.291
WT	0.880599	0.185553	6.21762	6.758
WT	18.6246	1.87235	6.29012	5.714
WT	2.22016	0.520125	-0.277264	5.56
WT	0.333552	0.114889	5.85774	4.731
WT	0.987741	0.196128	-0.980392	4.301
WT	0.198077	0.059127	4.87805	6.727
WT	24.6648	0.58502	6.48604	6.113
WT	2.69195	0.334091	4.17266	4.393
WT	7.7657	0.403794	3.21429	9.708
WT	36.0634	1.28733	6.04703	4.516
WT	1.9723	0.166805	0.288184	3.717
WT	0.146069	0.037976	26.5823	3.81
WT	32.5653	0.361492	12.5	5.161
WT	4.9271	0.381681	40.1763	5.376
WT	12.6749	0.538392	8.03571	3.164
WT	1.60364	0.199493	7.71084	3.901
WT	18.1417	1.05323	10.0867	5.161
WT	1.47319	0.173535	47.6454	3.84
WT	0.302871	0.045667	1.05263	5.161
WT	23.4644	0.677797	13.9007	4.27
WT	0.607962	0.135079	-0.355872	1.997
WT	0.817396	0.165363	7.26744	4.577
WT	12.7652	0.332649	3.75723	4.147
WT	3.84218	0.648474	7.9318	3.348
WT	0.898445	0.240834	4.39122	5.468
WT	0.550443	0.126907	10.9848	7.864
WT	12.9026	0.204781	9.85915	4.762
WT	23.4721	0.45571	5.16878	4.854
WT	0.831546	0.221125	6.08696	4.086
WT	0.376816	0.094699	3.5533	4.025
WT	4.83296	0.267273	2.51799	5.438
WT	0.332521	0.119215	8.46774	3.779
WT	47.8241	5.33825	16.2975	4.27
WT	27.6411	0.879213	3.28048	5.376
WT	0.169632	0.050474	10.4762	4.239
WT	8.5624	0.340341	2.40113	4.885
WT	31.0858	0.504262	34.795	5.806
WT	1.20283	0.152384	11.041	4.424
WT	0.493533	0.103833	13.8889	4.147
WT	1.92761	0.125945	-2.67176	4.854
WT	1.42872	0.19709	7.80488	5.13
WT	2.73184	0.364492	61.6162	3.902
WT	2.35974	0.436549	39.0361	4.423
WT	4.01367	0.602227	21.8341	5.499
WT	1.91837	0.322415	10.6036	5.161
WT	0.947859	0.176197	45.6716	4.454
WT	42.2424	0.408147	6.70103	9.032
WT	14.3521	0.61748	12.5213	4.516
WT	0.945903	0.213015	18.2716	4.516
WT	67.1496	0.786839	7.35294	5.284
WT	13.0024	0.354499	1.48368	13.363
WT	1.45905	0.228268	-1.84332	4.055
WT	17.954	0.581188	52.2172	4.915
WT	15.0899	0.941472	6.53631	4.577
WT	3.64751	0.380797	18.0939	4.608
WT	73.2243	0.25141	13.5983	4.7
WT	50.1649	2.60299	30.5314	4.608
WT	0.726087	0.181983	11.5607	4.577
WT	16.9348	2.08491	9.889	4.7
WT	1.91453	0.25404	9.93789	4.178
WT	18.9569	1.6389	4.68399	3.625
WT	4.92638	0.185139	9.09091	4.7
WT	1.52411	0.250358	5.67227	4.577
WT	3.57222	0.723198	-0.218182	6.482
WT	8.43778	0.350817	6.74663	6.205
WT	3.29095	0.423926	13.0273	5.222
WT	1.85315	0.451802	49.5925	5.376
WT	2.93094	0.39079	8.88291	11.981
WT	51.5782	1.9813	4.93631	6.175
WT	4.70514	0.800514	14.1919	8.11
WT	0.989186	0.197236	17.0667	4.239
WT	2.81429	0.736347	60.4286	5.007
WT	4.00851	0.525962	27	4.731
WT	6.42414	0.347661	2.118	6.205
WT	1.13997	0.230897	35.3075	4.117
WT	1.97288	0.236157	15.8129	5.007
WT	1.66607	0.195132	16.7116	4.393
WT	7.04096	0.381323	3.86207	4.546
WT	1.24151	0.282968	9.47955	9.185
WT	5.03307	0.211437	4.97512	7.557
WT	1.82067	0.209859	14.2857	4.423
WT	5.07643	0.115186	22.3744	6.021
WT	51.6645	5.0545	39.1259	4.27
WT	0.78698	0.229845	2.51716	5.191
WT	16.6742	0.310844	0.846024	4.608
WT	38.4821	1.79669	10.2864	3.932
WT	31.1365	2.40049	15.7318	3.717
WT	16.3608	1.34015	6.12245	4.915
WT	1.88173	0.203011	10.1176	4.086
WT	25.5687	0.998815	5.25813	4.731
WT	2.32341	0.163842	8.74636	4.424
WT	1.88328	0.233105	2.45902	13.824
WT	29.7342	1.63364	3.85739	6.789
WT	0.633988	0.153333	16.5109	4.147
WT	23.187	0.740394	4.12903	4.608
WT	5.96173	0.261287	8.95795	3.809
WT	7.44669	0.272274	35.614	4.731
WT	1.62399	0.280394	6.81431	4.823
WT	50.6362	1.12205	23.6696	3.287
WT	2.44909	0.210654	15.6463	4.915
WT	1.23717	0.197757	12.8019	4.639
WT	14.8713	0.413665	3.23326	8.571
WT	2.17726	0.328162	34.2067	4.915
WT	0.641619	0.148079	18.3871	4.577
WT	19.483	1.04467	37.9058	4.055
WT	0.431799	0.124195	6.15385	8.479
WT	32.1442	1.36901	8.5485	5.161
WT	1.40466	0.2011	17.5772	6.912
WT	0.979321	0.199667	2.39234	7.004
WT	6.52876	0.700269	2.1146	3.963
WT	0.867032	0.173395	35.2617	4.055
WT	4.68069	0.239792	41.6335	4.424
WT	2.53018	0.364942	36.3874	4.731
WT	0.942957	0.161931	33.3333	4.332
WT	4.48264	0.144735	1.65017	4.762
WT	32.8029	1.24816	10.0268	7.434
WT	18.1925	0.302845	12.4606	4.608
WT	19.4227	1.62266	7.35944	5.468
WT	12.6823	0.42704	9.0604	5.13
WT	38.8536	0.411754	25.522	5.468
WT	9.11208	0.639604	10.1568	3.963
WT	43.0135	2.14045	26.1044	4.27
WT	2.16081	0.351567	9.23913	4.639
WT	0.349802	0.063053	18.9394	5.622
WT	17.0541	0.733228	33.4202	6.605
WT	5.59049	0.343925	22.2222	4.239
WT	9.44898	0.625274	4.88923	4.731
WT	0.865617	0.170052	-3.93258	6.052
WT	5.15453	0.498213	43.2407	4.239
WT	1.92839	0.209221	0.913242	4.823
WT	20.3988	3.038	12.0327	4.608
WT	1.83208	0.285649	22.5753	4.731
WT	51.3434	2.35541	19.5903	6.789
WT	14.4326	0.814433	3.04985	4.362
WT	31.1581	0.405545	16.8433	5.929
WT	7.62653	0.530695	26.6427	6.144
WT	1.65116	0.180083	10.6101	3.902
WT	0.115199	0.038692	4.93827	0.921
WT	16.2698	0.492481	7.56547	4.116
WT	19.3974	0.93194	7.48334	5.192
WT	5.20532	0.472419	5.65657	5.069
