# Supplementary material for: Alterations of in vivo CA1 network activity in Dp(16)1Yey Down syndrome model mice
Source: eLife. 2018 Feb 27;7:e31543. doi: 10.7554/eLife.31543 (PMC5841929; doi:10.7554/eLife.31543)
Supplement: Figure 4—source data 1. [file elife-31543-fig4-data1.xlsx]

## Sheet: Figure 4B-F
Mouse ID	Group	Ripples per min	Inter-ripple interval (s)	Peak PSD frequency (Hz)	Ripple amplitude (nSD)	Ripple duration (ms)
Rm0005	WT	28	2.071	150.91	5.958	97.771
Rm0013	WT	29	2.055	148.603	6.171	99.707
Rm0050	WT	21	2.67	157.697	6.387	101.755
Rm0094	WT	27	2.002	144.098	6.381	94.681
Rm0126	WT	27	2.19	152.481	5.724	102.95
Rm0004	Dp16	25	2.4	125.229	4.728	92.216
Rm0012	Dp16	35	1.688	146.896	5.19	86.346
Rm0051	Dp16	16	3.829	140.929	5.541	96.313
Rm0093	Dp16	31	1.812	145.319	5.751	81.635
Rm0095	Dp16	15	3.946	146.432	5.343	92.198
Rm0125	Dp16	27	2.201	156.635	5.757	86.895
Average	WT	26.4	2.1976	150.758	6.1242	99.3728
	Dp16	24.8333	2.646	143.573	5.385	89.2672
	pvalue	0.692056	0.358002	0.191911	0.00669373	0.00487437

## Sheet: Figure 4G-H
Group	Spikes per SWR	Participation in SWR(%)				Spikes per SWR	Participation in SWR(%)
Dp16	0.143204	9.22		Dp16	avg.	0.218495	14.6613
Dp16	0.040049	3.16			SEM	0.0098534	0.591412
Dp16	0.07767	6.31		WT	avg.	0.241166	15.8074
Dp16	0.17233	12.99			SEM	0.00885696	0.511425
Dp16	0.061893	4.37
Dp16	0.491505	25.73			pvalue	0.00405578	0.0127105
Dp16	0.087379	6.67
Dp16	0.458738	26.58		Dp16	min	0.006122	0.61
Dp16	0.160194	10.19		Dp16	Q1	0.097177	7.16
Dp16	0.286408	19.17		Dp16	median	0.172869	12.64
Dp16	0.150485	12.62		Dp16	Q3	0.299494	20.405
Dp16	0.027913	2.67		Dp16	Max	1.0084	50.78
Dp16	0.169903	12.86
Dp16	0.093447	7.77		WT	min	0.00454	0.45
Dp16	0.106796	7.77		WT	Q1	0.144483	10.05
Dp16	0.035879	2.76		WT	median	0.199887	13.89
Dp16	0.057958	4.42		WT	Q3	0.313619	19.7275
Dp16	0.125115	9.02		WT	Max	0.935214	49.53
Dp16	0.136155	9.02
Dp16	0.220791	12.88
Dp16	0.198712	14.26
Dp16	0.209752	15.55
Dp16	0.093836	6.16
Dp16	0.048758	4.05
Dp16	0.147194	11.41
Dp16	0.059798	4.51
Dp16	0.093836	7.18
Dp16	0.189512	12.51
Dp16	0.090156	5.52
Dp16	0.087397	6.81
Dp16	0.370745	24.75
Dp16	0.170193	11.41
Dp16	0.113155	8.65
Dp16	0.457222	28.15
Dp16	0.287029	12.7
Dp16	0.461822	29.44
Dp16	0.137075	10.49
Dp16	0.035879	2.94
Dp16	0.080037	5.06
Dp16	0.076357	5.24
Dp16	0.191352	10.86
Dp16	0.190432	13.06
Dp16	0.093836	7.27
Dp16	0.459062	29.16
Dp16	0.109476	8.46
Dp16	0.157314	10.58
Dp16	0.336707	24.84
Dp16	0.291628	21.8
Dp16	0.280589	20.52
Dp16	0.343146	23.83
Dp16	0.098436	7.18
Dp16	0.104876	8.1
Dp16	0.24011	18.4
Dp16	0.157314	11.78
Dp16	0.457222	31.83
Dp16	0.391904	20.61
Dp16	0.073597	5.24
Dp16	0.298988	17.66
Dp16	0.766329	41.31
Dp16	0.107636	6.99
Dp16	0.422263	26.4
Dp16	0.172033	12.14
Dp16	0.305428	18.31
Dp16	0.459982	26.68
Dp16	0.166513	13.25
Dp16	0.641214	42.23
Dp16	0.25391	18.31
Dp16	0.686293	44.34
Dp16	0.325667	23.37
Dp16	0.132653	8.78
Dp16	0.085714	7.14
Dp16	0.089796	4.49
Dp16	0.259184	20.2
Dp16	0.397959	23.47
Dp16	0.157143	10.61
Dp16	0.085714	6.53
Dp16	0.077551	6.33
Dp16	0.12449	8.57
Dp16	0.061224	5.51
Dp16	0.07551	5.71
Dp16	0.128571	11.43
Dp16	0.061224	5.1
Dp16	0.095918	6.33
Dp16	0.140816	10.41
Dp16	0.485714	28.16
Dp16	0.163265	14.69
Dp16	0.169388	12.24
Dp16	0.120408	9.59
Dp16	0.259184	15.71
Dp16	0.085714	6.94
Dp16	0.069388	6.33
Dp16	0.146939	9.59
Dp16	0.3	18.37
Dp16	0.077551	5.1
Dp16	0.193878	14.29
Dp16	0.2	17.14
Dp16	0.387755	24.69
Dp16	0.755102	48.57
Dp16	0.144898	10
Dp16	0.07551	4.9
Dp16	0.32449	16.94
Dp16	0.687755	34.08
Dp16	0.340816	22.24
Dp16	0.095918	7.35
Dp16	0.130612	8.98
Dp16	0.222449	15.51
Dp16	0.079592	5.51
Dp16	0.32449	20.61
Dp16	0.12449	6.94
Dp16	0.036735	2.86
Dp16	0.030612	2.65
Dp16	0.073469	4.9
Dp16	0.383673	21.02
Dp16	0.1	6.33
Dp16	0.077551	4.69
Dp16	0.267347	15.92
Dp16	0.077551	4.9
Dp16	0.006122	0.61
Dp16	0.27551	18.16
Dp16	0.032653	1.43
Dp16	0.122449	8.16
Dp16	0.069388	5.51
Dp16	0.404082	25.71
Dp16	0.153061	10.61
Dp16	0.081633	5.92
Dp16	0.071429	5.31
Dp16	0.159184	13.06
Dp16	0.091837	6.73
Dp16	0.073469	5.51
Dp16	0.17551	10.61
Dp16	0.206122	15.51
Dp16	0.428571	28.98
Dp16	0.142857	9.59
Dp16	0.469388	32.86
Dp16	0.1	8.16
Dp16	0.25102	14.9
Dp16	0.440816	28.16
Dp16	0.244898	15.51
Dp16	0.346939	28.16
Dp16	0.183673	13.47
Dp16	0.053061	4.69
Dp16	0.222449	13.88
Dp16	0.144898	9.59
Dp16	0.255102	14.29
Dp16	0.073469	5.71
Dp16	0.218367	16.53
Dp16	0.083673	5.92
Dp16	0.183673	11.43
Dp16	0.335036	18.49
Dp16	0.341164	22.37
Dp16	0.306435	23.49
Dp16	0.362615	25.33
Dp16	0.295199	22.37
Dp16	0.629213	35.65
Dp16	0.200204	14.61
Dp16	0.532176	36.98
Dp16	0.294178	20.84
Dp16	0.11951	9.81
Dp16	0.264556	18.18
Dp16	0.452503	28.4
Dp16	0.14096	9.4
Dp16	0.300306	22.98
Dp16	0.381001	22.57
Dp16	0.243105	17.06
Dp16	0.111338	8.38
Dp16	0.576098	38.1
Dp16	0.195097	9.6
Dp16	0.685393	38
Dp16	0.230848	13.79
Dp16	0.221655	14.1
Dp16	0.144025	10.32
Dp16	0.303371	19.82
Dp16	0.055158	5.41
Dp16	0.064351	5.92
Dp16	0.28907	21.86
Dp16	0.120531	9.7
Dp16	0.21859	17.06
Dp16	0.429009	28.4
Dp16	0.366701	21.65
Dp16	0.184883	15.53
Dp16	0.543412	37.79
Dp16	0.174668	12.67
Dp16	0.191011	11.95
Dp16	0.195097	16.55
Dp16	0.631256	38.51
Dp16	0.373851	27.17
Dp16	0.230848	16.04
Dp16	0.237998	17.98
Dp16	0.037794	2.55
Dp16	0.101124	9.09
Dp16	0.161389	13.69
Dp16	0.361593	26.86
Dp16	0.241062	18.39
Dp16	0.39272	23.56
Dp16	0.346743	20.5
Dp16	0.10728	7.85
Dp16	0.201149	16.28
Dp16	0.442529	27.97
Dp16	0.030651	2.11
Dp16	0.038314	3.45
Dp16	0.101533	5.94
Dp16	0.086207	5.75
Dp16	0.467433	27.39
Dp16	0.072797	4.98
Dp16	0.137931	10.15
Dp16	0.172414	12.45
Dp16	0.070881	5.94
Dp16	0.249042	20.31
Dp16	0.038314	3.26
Dp16	0.193487	12.64
Dp16	0.189655	12.07
Dp16	0.172414	13.03
Dp16	0.145594	8.24
Dp16	0.045977	3.83
Dp16	0.17433	10.73
Dp16	0.101533	7.66
Dp16	0.206897	15.71
Dp16	0.51341	32.38
Dp16	0.197318	14.94
Dp16	0.166667	10.15
Dp16	0.172414	12.64
Dp16	0.095785	6.9
Dp16	0.111111	8.81
Dp16	0.091954	7.85
Dp16	0.137931	8.24
Dp16	0.061303	3.07
Dp16	0.038314	3.64
Dp16	0.195402	11.49
Dp16	0.229885	16.28
Dp16	0.319923	21.07
Dp16	0.285441	19.54
Dp16	0.103448	6.7
Dp16	0.183908	15.33
Dp16	0.070881	5.36
Dp16	0.465517	27.97
Dp16	0.547893	32.76
Dp16	0.170498	12.64
Dp16	0.068427	4.68
Dp16	0.364946	24.49
Dp16	0.104442	8.64
Dp16	0.205282	15.85
Dp16	0.177671	14.65
Dp16	0.364946	28.21
Dp16	0.172869	13.09
Dp16	0.183673	14.05
Dp16	0.337335	22.69
Dp16	0.154862	11.64
Dp16	0.453782	32.77
Dp16	0.246098	13.57
Dp16	0.115246	8.04
Dp16	1.0084	50.78
Dp16	0.132053	9.36
Dp16	0.184874	12.73
Dp16	0.114046	7.92
Dp16	0.043217	2.04
Dp16	0.067227	6.12
Dp16	0.430972	31.33
Dp16	0.345738	25.93
Dp16	0.188475	13.57
Dp16	0.138055	9.72
Dp16	0.195678	13.69
Dp16	0.213685	17.17
Dp16	0.385354	27.73
WT	0.499432	26.22
WT	0.425653	24.52
WT	0.00454	0.45
WT	0.079455	6.47
WT	0.096481	8.06
WT	0.364359	26.33
WT	0.045403	3.75
WT	0.209989	13.85
WT	0.200908	12.26
WT	0.576617	36.32
WT	0.16118	12.94
WT	0.464245	31.9
WT	0.128263	11.69
WT	0.155505	8.17
WT	0.648127	36.1
WT	0.286039	19.07
WT	0.062429	5.45
WT	0.14756	9.76
WT	0.139614	11.8
WT	0.123723	8.29
WT	0.353008	22.36
WT	0.116913	8.63
WT	0.247446	18.16
WT	0.263337	17.03
WT	0.395006	24.97
WT	0.199773	10.44
WT	0.418842	29.51
WT	0.448354	26.22
WT	0.300795	18.16
WT	0.211124	15.44
WT	0.366629	21.23
WT	0.279228	17.59
WT	0.269012	19.41
WT	0.179728	12.96
WT	0.182863	15.15
WT	0.700104	43.47
WT	0.22466	14.84
WT	0.352142	22.57
WT	0.149425	10.14
WT	0.268548	18.91
WT	0.299896	22.26
WT	0.164054	11.29
WT	0.169279	11.49
WT	0.217346	14.73
WT	0.245559	15.57
WT	0.189133	12.54
WT	0.264368	16.72
WT	0.169279	9.4
WT	0.521421	29.57
WT	0.478579	30.83
WT	0.073145	5.22
WT	0.38976	22.57
WT	0.120167	9.2
WT	0.141066	10.55
WT	0.15465	11.7
WT	0.318704	19.12
WT	0.117032	9.51
WT	0.170324	9.2
WT	0.133751	10.76
WT	0.142111	10.87
WT	0.034483	2.61
WT	0.527691	34.17
WT	0.100313	7.73
WT	0.46604	34.17
WT	0.075235	6.27
WT	0.350052	24.87
WT	0.935214	49.53
WT	0.267503	19.12
WT	0.123302	8.15
WT	0.258098	19.12
WT	0.351097	23.62
WT	0.020899	1.78
WT	0.090909	6.27
WT	0.208986	14.84
WT	0.075235	5.64
WT	0.239289	14.84
WT	0.198537	13.58
WT	0.263323	18.6
WT	0.241379	14.94
WT	0.332288	24.14
WT	0.166144	12.02
WT	0.121212	9.09
WT	0.141066	9.2
WT	0.114943	9.09
WT	0.141066	8.36
WT	0.090909	7.21
WT	0.524556	25.91
WT	0.308255	17.45
WT	0.178683	13.48
WT	0.201672	11.49
WT	0.39185	24.76
WT	0.277952	17.03
WT	0.525601	33.96
WT	0.266458	14
WT	0.157785	12.33
WT	0.089864	7.84
WT	0.207941	16.51
WT	0.165099	10.66
WT	0.063741	4.18
WT	0.104493	8.36
WT	0.147335	10.03
WT	0.051202	4.08
WT	0.091954	7.11
WT	0.144201	11.08
WT	0.243469	16.2
WT	0.370951	26.12
WT	0.113898	8.57
WT	0.159875	12.85
WT	0.097297	6.89
WT	0.064865	5.54
WT	0.197297	15.41
WT	0.152703	11.49
WT	0.078378	6.62
WT	0.235135	16.62
WT	0.393243	28.11
WT	0.336486	25.81
WT	0.222973	11.62
WT	0.059459	4.32
WT	0.132432	9.59
WT	0.171622	12.03
WT	0.482432	30.68
WT	0.197297	14.32
WT	0.197297	13.51
WT	0.071622	5
WT	0.058108	5.68
WT	0.072973	6.49
WT	0.185135	12.97
WT	0.362162	25.95
WT	0.17027	10.81
WT	0.171622	14.05
WT	0.059459	5.54
WT	0.047297	3.78
WT	0.198649	10.41
WT	0.227027	16.89
WT	0.194595	15
WT	0.133784	10
WT	0.031081	2.97
WT	0.240541	14.59
WT	0.324324	19.19
WT	0.164865	11.62
WT	0.12027	7.43
WT	0.186486	14.05
WT	0.12027	7.3
WT	0.044595	2.43
WT	0.290541	19.73
WT	0.163514	12.57
WT	0.194595	12.57
WT	0.193243	12.84
WT	0.378378	24.32
WT	0.275676	20
WT	0.131081	10.41
WT	0.166216	11.08
WT	0.2	14.32
WT	0.187838	13.24
WT	0.118919	8.65
WT	0.328378	19.05
WT	0.031081	2.57
WT	0.698649	39.32
WT	0.332432	26.49
WT	0.094595	5.54
WT	0.171622	13.38
WT	0.52027	25.14
WT	0.163514	10.14
WT	0.112162	8.92
WT	0.185135	9.86
WT	0.181081	10.41
WT	0.340254	19.49
WT	0.479815	28.26
WT	0.304498	22.26
WT	0.214533	15.92
WT	0.145329	7.96
WT	0.299885	22.49
WT	0.264129	20.42
WT	0.155709	9.23
WT	0.251442	17.99
WT	0.266436	17.99
WT	0.238754	15.46
WT	0.352941	21.22
WT	0.585928	36.33
WT	0.358708	23.76
WT	0.206459	10.5
WT	0.510957	19.72
WT	0.15917	11.76
WT	0.344867	24.45
WT	0.27451	18.57
WT	0.640138	40.48
WT	0.106113	6.69
WT	0.201845	15.22
WT	0.49481	34.49
WT	0.198385	15.57
WT	0.221453	16.49
WT	0.099193	8.07
WT	0.336794	25.61
WT	0.243368	18.11
WT	0.28489	22.15
WT	0.158016	12.23
WT	0.27105	18.8
WT	0.469435	26.3
WT	0.186851	14.88
WT	0.310265	16.15
WT	0.253749	15.69
WT	0.250288	14.88
WT	0.237601	18.34
WT	0.122261	7.96
WT	0.186851	14.53
WT	0.126874	9.23
WT	0.124567	8.54
WT	0.517878	25.14
WT	0.183391	13.26
WT	0.199539	16.03
WT	0.204152	13.49
WT	0.340254	19.15
WT	0.241061	18.34
WT	0.184211	12.32
WT	0.48	30.32
WT	0.117895	8.11
WT	0.167368	10.42
WT	0.448421	30.11
WT	0.128421	8.84
WT	0.369474	23.68
WT	0.22	12
WT	0.147368	9.16
WT	0.266316	17.37
WT	0.261053	15.89
WT	0.103158	8.42
WT	0.174737	13.37
WT	0.211579	13.89
WT	0.192632	13.79
WT	0.16	12.21
WT	0.431579	26.42
WT	0.148421	12.11
WT	0.412632	23.68
WT	0.221053	14.11
WT	0.198947	16.32
WT	0.502105	32.95
WT	0.174737	12
WT	0.233684	12.95
WT	0.353684	23.26
WT	0.193684	11.89
WT	0.230526	13.89
WT	0.195789	13.68
WT	0.102105	7.58
WT	0.118947	10.42
WT	0.316842	20.95
WT	0.215789	10.11
WT	0.644211	33.79
WT	0.243158	15.79
WT	0.294737	21.05
WT	0.049474	3.68
WT	0.267368	12.42
WT	0.323158	17.89
WT	0.449474	26.32
WT	0.141053	10.53
WT	0.5	26.84
WT	0.188421	13.37
WT	0.493684	31.05
WT	0.194737	13.68
WT	0.314737	19.16
WT	0.356842	26.11
WT	0.393684	23.37
WT	0.543158	27.16
WT	0.182105	12.42
WT	0.050526	3.26
WT	0.162105	12.21
WT	0.161053	11.79
WT	0.276842	19.16
