# Supplementary material for: Alterations of in vivo CA1 network activity in Dp(16)1Yey Down syndrome model mice
Source: eLife. 2018 Feb 27;7:e31543. doi: 10.7554/eLife.31543 (PMC5841929; doi:10.7554/eLife.31543)
Supplement: Figure 5—source data 1. [file elife-31543-fig5-data1.xlsx]

## Sheet: Figure 5B
Section	Genotype	SO - NPY density	SP - NPY density	SR - NPY density	SLM - NPY density					SO - NPY density	SP - NPY density	SR - NPY density	SLM - NPY density
137_1A	Dp16	0.56726	0.20065	0.113933	0.0809138			Dp16	avg.	0.614611	0.66779	0.155346	0.400587
137_1B	Dp16	0.704949	0.493273	0.0730303	0.433117				SEM	0.0377401	0.0738106	0.0165883	0.0327795
137_2A	Dp16	0.637413	0.399112	0.173333	0.394707			wt	avg.	0.711282	0.426492	0.115044	0.285811
137_2B	Dp16	0.910077	0.19922	0.141514	0.459901				SEM	0.035845	0.0734312	0.0102628	0.0300578
137_3A	Dp16	0.821351	0.414001	0.200355	0.417081
137_3B	Dp16	0.891802	0.593412	0.276514	0.547932				pvalue	0.0605263	0.0119383	0.108729	0.0163858
138_1A	Dp16	0.477729	0.30391	0.181107	0.398549
138_1B	Dp16	0.464037	0.290605	0.170444	0.380531
138_2A	Dp16	0.454258	0.376505	0.0589299	0.488044
138_2B	Dp16	0.712673	0.717685	0.228763	0.397198
138_3A	Dp16	0.484921	0.375171	0.143659	0.346651
138_3B	Dp16	0.50802	0.637505	0.0232073	0.434828
166_1A	Dp16	0.793597	0.56236	0.232276	0.722193
166_1B	Dp16	0.910101	0.784514	0.169383	0.291929
166_2A	Dp16	0.584007	1.18514	0.0786178	0.538883
166_2B	Dp16	0.911095	1.53784	0.218679	0.568136
166_3A	Dp16	0.561657	0.916498	0.329504	0.696375
166_3B	Dp16	0.528524	1.2412	0.288683	0.477588
169_1A	Dp16	0.433366	0.818866	0.180722	0.258203
169_1B	Dp16	0.285309	0.903831	0.0396872	0.409824
169_2A	Dp16	0.423101	0.774922	0.117652	0.137989
169_2B	Dp16	0.621166	0.847137	0.0751842	0.0959303
169_3A	Dp16	0.368598	1.16223	0.140133	0.339098
169_3B	Dp16	0.695643	0.291364	0.0729826	0.298495
139_1A	wt	0.824299	0.332002	0.119287	0.468013
139_1B	wt	0.635425	0.0876053	0.0638374	0.144035
139_2A	wt	0.627675	0.173139	0.064156	0.226807
139_2B	wt	0.601913	0.339488	0.05998	0.290606
139_3A	wt	0.738029	0.250085	0.0819092	0.217423
139_3B	wt	0.676209	0.17575	0.123584	0.32424
140_1A	wt	0.760982	0.0913065	0.091242	0.253736
140_1B	wt	0.50441	0.264824	0.0902076	0.108638
140_2A	wt	0.520361	0.0885709	0.0887365	0.116814
140_2B	wt	0.579656	0.0923855	0.0882196	0.164497
140_3A	wt	0.83572	0.269621	0.155578	0.296007
140_3B	wt	0.639229	0.188479	0.158844	0.278038
167_1A	wt	0.973203	0.816446	0.171312	0.155114
167_1B	wt	1.09644	1.08094	0.0724786	0.4536
167_2A	wt	0.744378	0.843119	0.0729325	0.430465
167_2B	wt	0.502463	1.08538	0.119751	0.402101
170_1A	wt	0.809176	0.598885	0.189786	0.584562
170_1B	wt	0.484947	0.18253	0.0899868	0.443352
170_2A	wt	0.919025	0.45207	0.124909	0.0692885
170_2B	wt	0.647873	0.852784	0.156464	0.287329
170_3B	wt	0.815501	0.690918	0.232717	0.287359

## Sheet: Figure 5C
Section	Genotype	SO - PV density	SP - PV density	SR - PV density	SLM - PV density				SO - PV density	SP - PV density	SR - PV density	SLM - PV density
137_1A	Dp16	0.161812	2.30151	0.378617	0		Dp16	avg.	0.262559	1.53014	0.118865	0.0305141
137_1B	Dp16	0.18638	2.26467	0.338007	0.0828518			SEM	0.0242151	0.120379	0.0254351	0.0121943
137_2A	Dp16	0.401346	2.77515	0.353306	0.2193		wt	avg.	0.405738	1.24806	0.076553	0.0134661
137_2B	Dp16	0.115415	2.54549	0.274377	0			SEM	0.0247772	0.0708407	0.00981694	0.00605152
137_3A	Dp16	0.280764	2.22843	0.211409	0.151004
137_3B	Dp16	0.310071	2.27895	0.371861	0.143198			pvalue	0.000182223	0.163975	0.967104	0.370889
138_1A	Dp16	0.18285	1.5836	0.0592475	0
138_1B	Dp16	0.248805	1.49183	0.0561273	0
138_2A	Dp16	0.134331	1.51331	0.0366172	0
138_2B	Dp16	0.328763	0.964514	0.0387423	0
138_3A	Dp16	0.269802	1.62192	0.0718385	0
138_3B	Dp16	0.197005	1.12571	0.056693	0
166_1A	Dp16	0.181686	1.35381	0.0745198	0.0457042
166_1B	Dp16	0.43002	1.16199	0.0609049	0
166_2A	Dp16	0.434512	0.931646	0.0738494	0.0446106
166_2B	Dp16	0.29026	1.15213	0.0956133	0
166_3A	Dp16	0.172577	0.949415	0.0481018	0
166_3B	Dp16	0.619021	1.3884	0.0467853	0.045669
169_1A	Dp16	0.324111	0.906012	0.0420227	0
169_1B	Dp16	0.286201	0.671593	0.0409839	0
169_2A	Dp16	0.202016	0.93394	0.02135	0
169_2B	Dp16	0.19507	1.63137	0.0407243	0
169_3A	Dp16	0.220549	1.1462	0.0610681	0
169_3B	Dp16	0.128056	1.80187	0	0
139_1A	wt	0.336508	1.48113	0.132762	0
139_1B	wt	0.427042	1.77391	0.100596	0
139_2A	wt	0.401821	0.990753	0.10441	0
139_2B	wt	0.266045	1.19811	0.100455	0.0444814
139_3A	wt	0.395262	1.27551	0.0979483	0
139_3B	wt	0.375678	1.65118	0.0245377	0
140_1A	wt	0.515614	1.64248	0.0608249	0
140_1B	wt	0.329468	1.0141	0.0292518	0
140_2A	wt	0.65574	0.839763	0.0870492	0
140_2B	wt	0.480859	1.09481	0.0546781	0
140_3A	wt	0.54072	1.08476	0.0831536	0
140_3B	wt	0.528732	0.96989	0.210603	0.105898
167_1A	wt	0.663767	1.0137	0.0278392	0.0421199
167_1B	wt	0.270966	1.59556	0.0547827	0.0883671
167_2A	wt	0.365627	1.19099	0.0510035	0
167_2B	wt	0.457345	1.15764	0.104258	0
167_3A	wt	0.470988	1.13925	0.0475912	0
167_3B	wt	0.172509	1.47304	0.169917	0
170_1A	wt	0.350611	0.865657	0.0614112	0
170_1B	wt	0.309724	1.40514	0	0
170_2A	wt	0.24877	2.00264	0.0270954	0.0423188
170_2B	wt	0.316567	1.62074	0.0515769	0
170_3A	wt	0.436972	0.895189	0.056817	0
170_3B	wt	0.420375	0.577579	0.0987115	0

## Sheet: Figure 5D
Section	Genotype	SO - SST density	SP - SST density	SR - SST density	SLM - SST density				SO - SST density	SP - SST density	SR - SST density	SLM - SST density
137_1A	Dp16	0.525911	0.578715	0	0		Dp16	avg.	0.480241	0.185198	0.00960741	0
137_1B	Dp16	0.83718	0.583894	0.0305061	0			SEM	0.0277732	0.0388718	0.0024357	0
137_2A	Dp16	0.506302	0.144942	0.0327509	0		wt	avg.	0.528277	0.137173	0.0163737	0.00732783
137_2B	Dp16	0.710356	0.264988	0	0			SEM	0.0281892	0.0355525	0.00484105	0.0040347
137_3A	Dp16	0.533274	0.5955	0	0
137_3B	Dp16	0.55557	0.138838	0	0			pvalue	0.281708	0.228799	0.489189	0.0809817
138_1A	Dp16	0.431344	0.122547	0	0
138_1B	Dp16	0.383884	0	0	0
138_2A	Dp16	0.230561	0.123265	0	0
138_2B	Dp16	0.407099	0.234375	0	0
138_3A	Dp16	0.379752	0	0	0
138_3B	Dp16	0.235428	0.235962	0	0
166_1A	Dp16	0.550184	0.403746	0.0205229	0
166_1B	Dp16	0.509107	0.101653	0.0214306	0
166_2A	Dp16	0.473377	0.209056	0.0207402	0
166_2B	Dp16	0.547158	0.0976809	0	0
166_3A	Dp16	0.551787	0.106504	0.0202473	0
169_1A	Dp16	0.442197	0.10242	0.0175048	0
169_1B	Dp16	0.472812	0	0	0
169_2A	Dp16	0.416899	0	0.0181116	0
169_2B	Dp16	0.318412	0	0.0194807	0
169_3A	Dp16	0.516078	0.105251	0	0
169_3B	Dp16	0.510876	0.110226	0.0196755	0
139_1A	wt	0.378228	0.220271	0.0239641	0
139_1B	wt	0.476531	0.117603	0.0764094	0
139_2A	wt	0.588844	0.0998048	0	0
139_2B	wt	0.589277	0.120186	0.0273281	0.0570605
139_3A	wt	0.568421	0.218534	0	0
139_3B	wt	0.598964	0	0	0
140_1A	wt	0.705818	0.0866229	0	0
140_1B	wt	0.756739	0.0811206	0.0186722	0
140_2A	wt	0.626844	0.0816545	0.0397015	0
140_2B	wt	0.599479	0.0888822	0.0206578	0
140_3A	wt	0.679984	0.0816871	0	0
140_3B	wt	0.408894	0	0.0211259	0
167_1A	wt	0.496663	0.816544	0.0281039	0
167_1B	wt	0.374507	0.352281	0	0
167_2A	wt	0.408717	0	0	0
167_2B	wt	0.511349	0.121967	0	0.054656
167_3A	wt	0.559539	0.122112	0.0611788	0.0568236
167_3B	wt	0.830809	0	0.0594528	0
170_1A	wt	0.405318	0.111437	0	0
170_1B	wt	0.465605	0.116354	0	0
170_2A	wt	0.426456	0	0	0
170_3A	wt	0.350966	0.21087	0	0
170_3B	wt	0.342424	0.107035	0	0
