# Supplementary material for: Alterations of in vivo CA1 network activity in Dp(16)1Yey Down syndrome model mice
Source: eLife. 2018 Feb 27;7:e31543. doi: 10.7554/eLife.31543 (PMC5841929; doi:10.7554/eLife.31543)
Supplement: Table 1—source data 1. [file elife-31543-table1-data1.xlsx]

## Sheet: Table 1 - Linear track
Group	Bursts per min	Mean inter-burst interval (s)	Mean burst duration (ms)	% of spikes in burst	Nb. Spikes per burst				Bursts per min	Mean inter-burst interval (s)	Mean burst duration (ms)	% of spikes in burst	Nb. Spikes per burst
Dp16	3.3018	17.6895	9.7289	0.2868	2.2462		Dp16	avg.	5.77662	25.1454	8.43466	0.244076	2.24325
Dp16	0.5588	60.1945	8.3529	0.0846	2			SEM	0.382656	1.90653	0.317572	0.00669971	0.00948692
Dp16	0.508	116.497	7.2347	0.0232	2.1		WT	avg.	7.90118	18.94	7.71975	0.330773	2.26417
Dp16	5.4353	11.0676	8.4084	0.1438	2.1402			SEM	0.532145	1.69153	0.185834	0.00826422	0.00828324
Dp16	0.508	89.3059	9.4742	0.0952	2.2
Dp16	16.9153	3.4913	8.9701	0.3018	2.2042			pvalue	0.000700941	0.000187643	2.66556e-07	2.17387e-13	0.0110153
Dp16	0.6096	96.723	9.0522	0.076	2.0833
Dp16	7.2639	8.1057	8.7421	0.1924	2.1189
Dp16	1.0159	57.746	8.233	0.0726	2
Dp16	7.8227	6.8761	8.3716	0.2162	2.1364
Dp16	0.254	173.414	7.8152	0.012	2
Dp16	1.8795	31.3397	12.0695	0.1446	2.5676
Dp16	4.7749	11.8916	8.0864	0.2074	2.2021
Dp16	0.2032	262.802	8.5173	0.0172	2
Dp16	1.8795	24.382	8.1715	0.1448	2
Dp16	1.8201	33.3797	7.5403	0.2892	2.1818
Dp16	3.3093	12.7575	8.8328	0.2853	2.225
Dp16	4.4676	13.4722	79.8532	0.3393	2.0926
Dp16	2.9784	14.5025	9.0939	0.3401	2.3333
Dp16	7.1978	8.1455	7.2326	0.3221	2.1954
Dp16	3.6403	16.7447	10.361	0.3085	2.6364
Dp16	2.6475	21.7918	7.9738	0.1688	2.0625
Dp16	4.8813	11.9156	7.8977	0.2695	2.1695
Dp16	0.6619	74.928	7.342	0.1538	2.25
Dp16	1.7374	32.3408	6.7232	0.1199	2.0952
Dp16	1.4892	36.6236	10.0505	0.2167	2.4444
Dp16	1.7374	25.926	7.7416	0.17	2.0476
Dp16	5.6259	9.7013	9.356	0.2333	2.3676
Dp16	2.6475	20.5223	6.8861	0.2073	2.125
Dp16	2.3993	24.8189	7.9151	0.2548	2.3103
Dp16	4.6331	12.4623	7.9181	0.1273	2.2143
Dp16	3.9712	12.8396	7.7671	0.3841	2.2083
Dp16	3.9712	14.9152	8.8173	0.2846	2.1875
Dp16	14.2301	4.123	8.1611	0.308	2.3605
Dp16	1.1583	54.4841	7.7567	0.2157	2.3571
Dp16	12.3273	4.8241	8.456	0.2919	2.3356
Dp16	2.482	15.7971	7.7076	0.1284	2.0667
Dp16	0.6619	64.438	10.4101	0.1652	2.375
Dp16	2.8129	20.3054	6.9942	0.3512	2.1176
Dp16	1.1583	40.8888	7.0416	0.2609	2.1429
Dp16	9.5143	6.3066	6.2674	0.5375	2.2435
Dp16	1.7374	29.4507	7.6273	0.1897	2.0952
Dp16	0.7446	72.1354	10.0149	0.1307	2.2222
Dp16	11.9963	5.0207	6.9027	0.2632	2.1379
Dp16	6.4532	8.559	7.6367	0.3295	2.1923
Dp16	1.8201	29.7418	8.98	0.2488	2.3636
Dp16	1.9856	27.4191	6.8914	0.1417	2.125
Dp16	3.8057	15.6272	7.3735	0.1867	2.1957
Dp16	3.8057	14.1892	6.7785	0.1263	2.0435
Dp16	6.4532	9.0081	8.949	0.2304	2.4103
Dp16	5.5431	10.6469	7.796	0.2754	2.1045
Dp16	1.5719	21.4634	5.6056	0.25	2.1579
Dp16	3.4748	16.7561	8.0801	0.1829	2.2381
Dp16	4.5503	12.5369	6.7819	0.2667	2.1091
Dp16	31.1905	1.9127	6.4234	0.3827	2.2679
Dp16	19.5251	2.9959	6.4141	0.5943	2.2839
Dp16	1.4892	39.3738	8.2143	0.1724	2.2222
Dp16	3.4748	10.7768	7.3018	0.2627	2.2143
Dp16	23.0826	2.5899	6.7473	0.4324	2.3154
Dp16	2.0683	26.4084	6.5384	0.3537	2.08
Dp16	5.7913	10.098	8.2307	0.3733	2.4
Dp16	1.9029	31.5467	5.6737	0.245	2.1304
Dp16	13.8165	4.3551	5.5869	0.5179	2.1617
Dp16	10.2589	5.766	7.978	0.2628	2.2419
Dp16	0.9928	39.6776	5.2916	0.2824	2
Dp16	13.8165	4.3031	7.9753	0.2437	2.2156
Dp16	5.2122	10.9412	8.0081	0.1758	2.2381
Dp16	7.3633	7.9065	7.3438	0.1514	2.2135
Dp16	5.1295	11.829	6.8981	0.1754	2.0484
Dp16	2.1749	25.7873	7.8215	0.2718	2.2083
Dp16	5.7543	10.1475	8.023	0.2626	2.2913
Dp16	1.8577	26.5502	7.8111	0.3116	2.2195
Dp16	2.6733	20.434	9.5544	0.0944	2.3898
Dp16	13.8195	4.3237	7.8548	0.3115	2.3115
Dp16	6.4793	8.7491	8.0106	0.257	2.3217
Dp16	1.903	29.8509	6.4665	0.4035	2.1905
Dp16	2.2202	26.5305	7.0669	0.2399	2.0612
Dp16	8.3823	6.5847	7.044	0.4829	2.3622
Dp16	4.0779	12.2822	8.9835	0.1973	2.2778
Dp16	4.6669	12.8788	7.3737	0.4087	2.2816
Dp16	1.7218	35.2519	8.1036	0.067	2.2105
Dp16	1.3593	36.5205	8.9703	0.23	2.3
Dp16	0.589	88.2028	12.6875	0.2701	2.8462
Dp16	2.492	22.2272	7.7553	0.342	2.1455
Dp16	33.6651	1.7606	7.8547	0.4579	2.3513
Dp16	6.7965	8.6352	7.5383	0.1302	2.2267
Dp16	4.9388	12.0931	8.1327	0.419	2.3486
Dp16	1.3593	45.3666	6.2802	0.1587	2
Dp16	15.1335	3.9393	7.7406	0.3952	2.3263
Dp16	2.3561	20.7421	7.5931	0.3933	2.2692
Dp16	1.6765	32.5733	8.3168	0.204	2.1892
Dp16	6.1621	9.1693	7.7453	0.3504	2.3088
Dp16	6.7512	7.8779	7.8274	0.3353	2.2953
Dp16	3.1717	15.5624	9.2669	0.2155	2.3429
Dp16	8.3823	6.8276	6.6576	0.3029	2.173
Dp16	3.5342	16.6459	7.8265	0.1153	2.2564
Dp16	9.3791	6.3729	7.3876	0.2703	2.2995
Dp16	7.3855	7.669	6.1191	0.1399	2.135
Dp16	2.0389	26.9705	8.4726	0.3156	2.2444
Dp16	0.3172	22.4361	10.4011	0.0486	2.2857
Dp16	9.6057	6.1924	9.0912	0.2585	2.2877
Dp16	9.6963	5.7685	7.5755	0.3116	2.229
Dp16	15.3147	3.7675	7.5531	0.4175	2.284
Dp16	1.3593	39.2442	6.998	0.2278	2.1333
Dp16	6.7965	8.0414	7.5776	0.303	2.22
Dp16	5.9356	9.0881	9.7484	0.2152	2.6412
Dp16	4.3497	13	8.0531	0.4203	2.1979
Dp16	11.8712	5.0333	8.119	0.2785	2.2366
Dp16	0.6796	47.0781	10.189	0.2281	2.6
Dp16	3.9873	15.0374	9.0506	0.0688	2.1364
Dp16	3.4889	16.8441	8.9822	0.1848	2.2468
Dp16	4.7575	12.0598	8.3415	0.3895	2.5524
Dp16	19.302	3.0716	10.062	0.2799	2.5798
Dp16	2.9451	18.9436	7.741	0.2633	2.2769
Dp16	1.9936	27.4858	8.5507	0.205	2.4318
Dp16	10.6931	5.4789	7.7312	0.3158	2.3983
Dp16	1.9936	24.3732	9.4449	0.2037	2.4773
Dp16	1.0874	41.0321	9.6345	0.3427	2.5417
Dp16	10.5572	5.361	6.8466	0.2915	2.2403
Dp16	1.0874	50.0698	9.9417	0.2625	2.625
Dp16	1.9483	14.4887	8.3701	0.5803	2.6047
Dp16	0.3172	107.227	11.6651	0.2817	2.8571
Dp16	18.8489	3.1749	8.1569	0.3392	2.3558
Dp16	0.4984	47.5389	8.2525	0.1294	2.3636
Dp16	1.314	27.9305	7.4249	0.1799	2.0345
Dp16	1.4499	40.9873	6.4858	0.251	2.0625
Dp16	0.589	19.7505	8.5262	0.1107	2.0769
Dp16	0.4531	120.412	8.1194	0.2759	2.4
Dp16	3.5795	15.4437	8.7505	0.3778	2.3291
Dp16	0.3625	99.186	7.3382	0.0904	2
Dp16	17.6708	3.3983	7.1654	0.3335	2.3103
Dp16	3.5795	15.9299	7.9549	0.1345	2.3038
Dp16	1.6312	27.0244	6.9913	0.0951	2.1111
Dp16	2.8092	20.4541	5.9562	0.1072	2
Dp16	2.9451	18.9798	9.3398	0.2391	2.4462
Dp16	7.5214	7.3293	7.7816	0.3401	2.2289
Dp16	3.9873	13.4645	6.8129	0.1621	2.1591
Dp16	1.314	43.29	9.7847	0.2691	2.5517
Dp16	3.6248	16.469	7.7422	0.1596	2.2
Dp16	1.4046	33.5933	7.1072	0.1159	2.0645
Dp16	3.6701	11.9817	7.961	0.2371	2.2099
Dp16	1.8577	29.9374	8.1678	0.3299	2.3171
Dp16	8.6995	6.1384	7.0621	0.3008	2.2188
Dp16	1.0421	50.8233	11.7726	0.2833	2.8696
Dp16	2.9904	18.8048	7.3129	0.354	2.1667
Dp16	5.1653	10.9513	7.037	0.3649	2.2281
Dp16	1.4046	40.0823	7.468	0.2092	2.1935
Dp16	4.1685	13.2229	7.8089	0.2756	2.25
Dp16	2.9907	18.5061	7.4111	0.2915	2.3231
Dp16	2.6686	20.9713	6.9093	0.1471	2.1207
Dp16	4.6011	12.9681	8.0877	0.1689	2.12
Dp16	15.1377	3.9666	11.97	0.429	2.1763
Dp16	5.5213	10.01	7.8085	0.1939	2.1833
Dp16	10.6286	5.5156	46.6856	0.2409	2.2251
Dp16	0.7822	68.8215	8.2185	0.0328	2.1176
Dp16	11.6868	5.103	7.3265	0.2082	2.0906
Dp16	3.0827	19.6604	7.4998	0.6507	2.2239
Dp16	1.6564	31.582	7.1637	0.3089	2.2222
Dp16	24.1098	2.4345	7.7902	0.3584	2.2519
Dp16	14.0334	4.2814	7.642	0.3096	2.1803
Dp16	5.3833	9.3785	8.0329	0.3329	2.2051
Dp16	0.8742	62.6558	9.3567	0.1308	2.2105
Dp16	33.8182	1.7719	7.5645	0.4112	2.1891
Dp16	8.9262	6.4809	7.7059	0.2582	2.1907
Dp16	0.4601	122.191	6.8107	0.1504	2
Dp16	4.6931	12.4148	7.1969	0.1179	2.0784
Dp16	5.9354	9.5757	8.3035	0.3792	2.3488
Dp16	17.6683	3.3112	8.1956	0.293	2.3646
Dp16	5.8894	8.7499	8.706	0.333	2.3516
Dp16	20.567	2.8875	7.8616	0.2827	2.2438
Dp16	5.0612	11.3864	7.5694	0.4065	2.2727
Dp16	13.0212	4.5831	8.4458	0.2767	2.3534
Dp16	2.0245	29.8228	8.6177	0.0927	2.1818
Dp16	0.7362	38.0299	8.5959	0.2992	2.375
Dp16	4.8772	11.6246	7.9639	0.2197	2.3585
Dp16	0.9202	58.8863	6.717	0.0901	2
Dp16	0.5061	49.9678	7.5069	0.2286	2.1818
Dp16	1.1043	50.4771	10.6303	0.1335	2.4583
Dp16	7.4078	7.4459	8.5363	0.26	2.3851
Dp16	0.2301	172.376	7.809	0.0117	2
Dp16	5.3833	10.9506	8.2419	0.1347	2.2564
Dp16	4.8312	10.6527	11.9007	0.3662	2.7238
Dp16	3.9109	14.7639	6.8845	0.4122	2.1529
Dp16	2.2085	26.7471	7.2991	0.1187	2.1042
Dp16	1.8865	30.522	6.7854	0.0908	2.0732
Dp16	4.187	13.4187	6.798	0.1399	2.1648
Dp16	14.2174	4.1899	9.8548	0.2498	2.4207
Dp16	2.9907	20.1928	8.1677	0.1217	2.2
Dp16	4.233	13.353	8.472	0.1571	2.2391
Dp16	2.3006	24.945	7.5756	0.0837	2.14
Dp16	5.5674	10.2084	7.3356	0.1612	2.0992
Dp16	4.049	14.3611	7.1313	0.1353	2.1023
Dp16	0.5521	108.978	6.4489	0.0681	2.0833
Dp16	15.0838	3.9398	7.9999	0.3494	2.2727
Dp16	14.9591	3.9826	8.0758	0.3192	2.3194
Dp16	0.9973	48.8219	8.2675	0.3	2.25
Dp16	5.9421	9.8739	7.5558	0.1427	2.1469
Dp16	2.6178	22.9331	8.1482	0.1095	2.3651
Dp16	1.5375	33.985	7.0008	0.3981	2.2162
Dp16	1.8699	28.2752	8.8132	0.3223	2.3778
Dp16	12.3828	4.8277	7.9787	0.3572	2.3255
Dp16	2.2439	24.2373	8.5999	0.3713	2.2963
Dp16	10.9284	5.4991	6.9147	0.2055	2.2015
Dp16	3.4489	16.6945	8.2363	0.3251	2.2289
Dp16	1.579	33.7591	8.1019	0.2958	2.2105
Dp16	3.5736	9.9464	9.9227	0.3589	2.3953
Dp16	1.205	44.8032	6.7924	0.1773	2.1034
Dp16	6.6069	8.7904	7.156	0.1378	2.1069
Dp16	1.7452	31.5015	7.8446	0.1957	2.1667
Dp16	2.4932	22.8167	7.936	0.1152	2.0833
Dp16	4.2384	13.8649	7.1125	0.1738	2.1078
Dp16	5.0279	11.4564	6.8412	0.1186	2.0744
Dp16	10.0558	5.9288	8.4088	0.3676	2.3058
Dp16	6.7731	8.5471	8.3888	0.2871	2.184
Dp16	28.3392	2.0978	7.6172	0.2971	2.2053
Dp16	11.4686	5.1307	7.4753	0.3377	2.1594
Dp16	5.6097	10.1456	7.5871	0.2296	2.1481
Dp16	16.4134	3.6621	7.4899	0.2795	2.3443
Dp16	8.6846	6.8216	8.6588	0.2377	2.4593
Dp16	0.2909	105.981	7.8951	0.1735	2.4286
Dp16	1.8283	31.9113	9.3235	0.2467	2.5227
Dp16	4.5708	12.3068	8.4282	0.3386	2.3182
Dp16	3.2827	17.5163	8.7785	0.3555	2.3038
Dp16	0.374	125.546	9.2773	0.064	2.3333
Dp16	4.4877	11.8926	7.6988	0.2975	2.3611
Dp16	0.4155	99.4571	5.9042	0.1351	2
Dp16	6.5654	8.3861	7.352	0.2239	2.1962
Dp16	5.0279	11.3041	7.5446	0.1811	2.2066
Dp16	3.4905	16.3194	7.8881	0.1674	2.2857
Dp16	3.7398	14.882	7.8616	0.1549	2.1444
Dp16	4.8617	12.1508	7.8438	0.2138	2.1709
Dp16	1.6621	35.1768	8.1993	0.1705	2.25
Dp16	5.5266	10.6028	7.95	0.1866	2.218
Dp16	0.8311	63.9518	7.5063	0.0704	2.1
Dp16	18.2418	3.2686	7.4773	0.2925	2.2711
Dp16	14.0034	4.2448	7.27	0.3026	2.1721
Dp16	1.4128	23.4517	7.4658	0.2407	2.0882
Dp16	0.6163	68.8986	9.8637	0.3019	2.6667
Dp16	3.6977	15.6434	6.6521	0.1696	2.125
Dp16	1.8488	30.3705	9.1111	0.1229	2.25
Dp16	18.6425	3.2194	7.2564	0.2675	2.2259
Dp16	2.7733	21.423	7.7006	0.1088	2.1111
Dp16	25.473	2.3222	7.8275	0.3869	2.1895
Dp16	9.7578	6.1309	7.3946	0.3576	2.1737
Dp16	13.2501	4.526	8.6769	0.2502	2.2326
Dp16	22.8538	2.6005	7.74	0.3323	2.2045
Dp16	4.314	12.7772	8.5526	0.2598	2.2143
Dp16	11.1958	5.3451	6.76	0.1604	2.1239
Dp16	5.6492	8.943	9.2655	0.3819	2.3818
Dp16	2.6706	22.2946	8.3635	0.1982	2.1731
Dp16	27.3218	2.1729	7.6097	0.387	2.3214
Dp16	1.0785	44.7519	7.2676	0.149	2.1429
Dp16	1.7461	26.389	8.588	0.1946	2.3529
Dp16	1.1298	51.5147	7.1185	0.2706	2.0909
Dp16	1.9002	29.2071	10.3959	0.3087	2.5946
Dp16	1.5407	21.4261	10.7028	0.2194	2.5667
Dp16	17.7181	3.3747	7.9762	0.2181	2.3014
Dp16	1.9002	31.8699	7.9349	0.1071	2.1622
Dp16	5.2384	11.05	7.904	0.3007	2.2255
Dp16	2.5165	21.6741	6.7334	0.1476	2.0816
Dp16	3.6463	15.8649	7.7124	0.3011	2.2394
Dp16	2.4651	19.6481	8.1383	0.1641	2.1875
Dp16	6.8305	8.5314	7.3421	0.2162	2.1729
WT	1.7256	34.2303	7.7218	0.3383	2.2667
WT	5.6368	10.5207	7.8975	0.4783	2.3571
WT	0.6327	58.2715	7.5293	0.2292	2
WT	2.5308	12.9733	8.5983	0.3864	2.3182
WT	1.4955	16.8169	7.8632	0.5285	2.5
WT	6.2695	9.3448	8.6501	0.2591	2.3578
WT	1.0929	32.3216	8.925	0.1841	2.3158
WT	5.8669	9.7623	8.6001	0.3657	2.3627
WT	3.221	10.2212	7.8577	0.6804	2.3571
WT	3.106	15.726	8.9446	0.2182	2.4444
WT	4.6015	9.493	7.0438	0.2669	2.225
WT	6.3271	9.4718	7.3429	0.1313	2.1727
WT	1.8406	32.6199	8.5651	0.1614	2.2188
WT	5.9244	8.2024	6.7494	0.5759	2.5049
WT	35.9492	1.6487	7.5431	0.5182	2.4848
WT	9.8357	5.8575	5.8672	0.3389	2.2573
WT	7.9376	7.244	6.5403	0.5116	2.2319
WT	1.7831	29.4454	5.3917	0.2857	2.3226
WT	6.6147	8.6005	8.1149	0.2414	2.3304
WT	0.9778	60.1124	6.2561	0.1097	2.0588
WT	12.424	4.771	6.8033	0.2713	2.1944
WT	3.1635	17.8982	7.1967	0.461	2.2545
WT	2.3583	16.2707	8.137	0.3529	2.1951
WT	5.6368	8.542	9.211	0.4463	2.4184
WT	10.871	5.3356	7.2116	0.3358	2.1905
WT	26.2285	2.2777	7.4894	0.4594	2.261
WT	5.8669	9.2388	9.062	0.3526	2.3922
WT	32.6706	1.8238	6.1749	0.4646	2.1919
WT	45.2097	1.2972	6.2702	0.5657	2.2634
WT	4.1989	13.5423	7.0533	0.2169	2.1507
WT	8.4552	6.7433	7.4366	0.3623	2.2381
WT	5.0616	10.0357	6.1481	0.2987	2.1591
WT	0.8053	24.5562	5.6174	0.3944	2
WT	6.3336	9.4541	7.99	0.4673	2.4138
WT	5.3289	10.0455	7.0621	0.2604	2.1967
WT	40.4474	1.481	5.5817	0.4523	2.2052
WT	6.7267	8.1133	8.3451	0.3266	2.3247
WT	6.1152	9.1849	6.7852	0.322	2.1
WT	3.4944	15.86	8.1409	0.4111	2.4
WT	4.368	12.6146	7.295	0.2298	2.19
WT	19.2628	3.0834	7.0691	0.2675	2.2358
WT	0.961	49.4824	8.0265	0.3401	2.2727
WT	1.9219	27.7584	5.9375	0.3467	2.1591
WT	1.9656	26.8354	7.738	0.247	2.2667
WT	3.9312	15.2215	6.9892	0.2899	2.2222
WT	0.4805	118.703	8.2303	0.0472	2.0909
WT	6.2025	8.756	7.3492	0.234	2.1831
WT	4.8921	11.2003	7.0574	0.2081	2.2054
WT	7.9497	7.5279	7.2189	0.2559	2.1868
WT	8.6486	6.3394	6.8555	0.215	2.1313
WT	1.8782	32.2955	8.213	0.2587	2.2558
WT	3.9749	13.2307	6.593	0.2736	2.1978
WT	5.2852	10.3102	7.7285	0.4928	2.2645
WT	5.0232	11.9971	7.5298	0.3174	2.2
WT	2.0529	27.7073	8.7225	0.271	2.4681
WT	26.0331	2.2834	7.6513	0.3851	2.2534
WT	0.2184	207.803	8.6138	0.0318	2
WT	4.6737	10.4399	8.0857	0.4991	2.514
WT	7.8187	6.9408	7.1475	0.3333	2.1676
WT	3.5817	16.6984	9.6259	0.2165	2.4024
WT	2.4461	19.0177	7.5115	0.4645	2.3393
WT	14.7638	4.049	7.1082	0.2471	2.1746
WT	5.6347	8.5426	7.4229	0.4357	2.2326
WT	10.9199	5.3467	7.3333	0.2288	2.188
WT	1.0483	49.9144	8.0459	0.2325	2.2083
WT	4.2369	14.0029	7.1695	0.1252	2.1134
WT	16.8167	3.5674	7.1883	0.33	2.2208
WT	7.1198	7.2795	8.3029	0.2903	2.2209
WT	4.5427	11.1794	5.4422	0.5461	2.1058
WT	2.6645	19.4394	7.543	0.2456	2.2623
WT	2.7518	20.2169	6.7726	0.1628	2.0952
WT	0.6552	26.7059	8.5525	0.2409	2.2
WT	2.6645	20.4497	8.437	0.3655	2.3607
WT	8.6923	6.7249	8.2705	0.3113	2.2915
WT	6.5083	8.4574	8.3897	0.2144	2.2416
WT	0.6552	48.6086	6.9672	0.1491	2.2667
WT	2.8829	19.2479	8.3298	0.2157	2.4091
WT	4.5427	12.8607	7.2145	0.1818	2.2115
WT	5.1979	11.4778	7.8493	0.2645	2.2269
WT	1.5725	35.4567	6.4862	0.1849	2.1111
WT	4.1059	13.4179	9.2859	0.3173	2.734
WT	3.407	15.5019	8.6611	0.2122	2.359
WT	1.0046	49.6216	8.8553	0.4234	2.5217
WT	5.9404	9.8072	7.5526	0.2638	2.2794
WT	2.6645	22.2036	7.7234	0.2509	2.2787
WT	0.6989	53.4772	8.7319	0.3047	2.4375
WT	19.4375	2.9793	5.8813	0.6059	2.3213
WT	27.4309	2.1848	6.9156	0.441	2.2755
WT	13.7591	4.3654	5.1086	0.4106	2.1429
WT	21.2284	2.7072	5.8042	0.4951	2.2037
WT	16.5546	3.6146	6.7239	0.6296	2.3905
WT	6.683	8.8011	5.7448	0.6323	2.3268
WT	7.2072	8.187	6.4507	0.2794	2.2485
WT	31.6241	1.8964	6.802	0.6622	2.4392
WT	0.8299	42.9795	6.4513	0.5122	2.2105
WT	7.0761	8.4187	6.9897	0.296	2.2037
WT	1.1794	46.0452	6.1519	0.2588	2.1852
WT	0.2621	129.563	6.8098	0.0915	2.3333
WT	0.7862	59.2653	7.2774	0.2209	2.1111
WT	3.9749	14.8949	7.1739	0.2395	2.1868
WT	3.2323	17.0941	7.8427	0.4526	2.2568
WT	1.2667	38.5768	6.1238	0.5	2.2069
WT	1.092	44.1085	6.4818	0.3916	2.24
WT	0.6552	73.2895	6.6806	0.2519	2.2
WT	8.2991	7.2035	6.4825	0.3163	2.1842
WT	7.775	7.6758	7.8038	0.2399	2.2753
WT	2.2277	23.982	6.7928	0.2449	2.098
WT	2.0529	29.6205	6.7767	0.1526	2.0426
WT	6.8701	7.4288	7.246	0.436	2.2197
WT	3.5912	16.2244	7.7335	0.2484	2.2899
WT	17.5917	3.3745	7.5541	0.3335	2.2515
WT	3.2269	17.1331	7.9411	0.1703	2.2581
WT	5.5169	9.6452	6.992	0.2727	2.2358
WT	5.5169	10.7169	7.906	0.2212	2.1887
WT	16.3426	3.6178	7.5463	0.1996	2.2261
WT	11.5543	5.0794	7.1664	0.1811	2.2207
WT	18.8408	3.0713	8.1915	0.4906	2.4503
WT	1.145	47.6121	7.2903	0.3864	2.3182
WT	6.8701	8.4301	7.2141	0.3564	2.2273
WT	2.4462	20.6225	6.6904	0.4534	2.383
WT	44.9161	1.2866	7.2962	0.4232	2.3198
WT	2.29	22.1959	7.4077	0.2886	2.25
WT	1.2491	43.5586	9.9225	0.1862	2.5833
WT	6.1935	8.525	6.9373	0.336	2.1176
WT	4.0076	13.3024	7.8747	0.3507	2.3636
WT	0.4684	122.757	7.9872	0.0957	2
WT	5.4649	9.7162	8.2427	0.2338	2.2381
WT	16.759	3.5095	7.6796	0.2388	2.2484
WT	1.5093	34.1901	6.9469	0.1527	2.069
WT	2.9146	19.0777	7.0409	0.3113	2.1071
WT	0.2602	127.803	7.692	0.08	2
WT	1.4053	36.9182	6.9677	0.1021	2
WT	1.8737	31.4322	7.3327	0.2647	2.25
WT	6.6099	8.5536	7.4593	0.2366	2.1181
WT	8.0672	6.5457	7.1764	0.3232	2.2
WT	4.2678	11.246	8.0467	0.2925	2.2439
WT	1.3012	23.9744	6.1403	0.3148	2.04
WT	10.5134	5.4699	8.9488	0.5095	2.7822
WT	12.0227	4.7996	8.2122	0.4582	2.3983
WT	16.6549	3.5767	5.9948	0.4296	2.3156
WT	8.0152	7.0315	7.002	0.372	2.2273
WT	10.1491	5.9157	7.9344	0.2818	2.2718
WT	13.376	4.3272	7.2823	0.7374	2.5019
WT	0.8848	53.4202	6.4511	0.3304	2.2353
WT	4.7883	12.1405	9.0086	0.3933	2.5652
WT	1.1971	44.5999	12.3254	0.1412	2.6522
WT	1.2491	43.5067	6.5331	0.327	2.1667
WT	3.6433	15.6731	9.2182	0.3629	2.5143
WT	5.6731	9.7548	7.8304	0.2584	2.3945
WT	2.7585	21.2531	7.4152	0.1831	2.2453
WT	0.9889	44.7746	8.9154	0.4404	2.5263
WT	4.3199	12.4479	7.2659	0.2319	2.2048
WT	15.2496	3.9243	8.0259	0.3098	2.2867
WT	4.3199	13.4944	6.7639	0.1837	2.0843
WT	5.621	10.2613	7.2542	0.3161	2.1574
WT	2.3941	24.289	8.6184	0.3156	2.3261
WT	0.2602	263.307	7.981	0.08	2
WT	39.7635	1.4876	7.1479	0.3948	2.3338
WT	5.4649	9.6161	7.7318	0.1269	2.1905
WT	4.3719	12.094	8.241	0.3139	2.2381
WT	5.4128	10.3525	7.9065	0.2335	2.1731
WT	10.7736	5.3573	7.3795	0.3898	2.1787
WT	2.4462	21.8452	7.9133	0.2943	2.2979
WT	3.0707	13.9342	7.7711	0.4138	2.2373
WT	0.8327	65.9038	6.8178	0.2381	2.1875
WT	1.9778	17.0296	9.8926	0.4498	2.7105
WT	15.8053	3.6524	5.9267	0.6316	2.2369
WT	22.5651	2.6593	6.6758	0.5681	2.2392
WT	19.015	3.1482	6.7994	0.5276	2.1483
WT	4.6686	12.8943	7.9584	0.349	2.3958
WT	3.3556	15.5403	6.5291	0.5152	2.2174
WT	8.0242	7.2238	8.3923	0.2715	2.3576
WT	3.1611	18.7507	7.6402	0.162	2.2462
WT	4.0364	13.8167	7.1444	0.3776	2.1928
WT	3.9878	15.0585	9.5348	0.1791	2.2561
WT	0.5836	99.3207	8.9779	0.2458	2.4167
WT	9.9209	5.4076	9.0987	0.4175	2.3333
WT	14.784	3.8419	8.3294	0.578	2.4375
WT	21.1548	2.7871	7.3143	0.2993	2.2207
WT	1.3617	36.8614	7.2333	0.3462	2.25
WT	5.3009	7.6762	8.2299	0.617	2.3945
WT	20.2308	2.8642	8.6	0.5877	2.4159
WT	10.1154	4.6444	6.9126	0.5072	2.2163
WT	32.3401	1.8511	6.4002	0.3907	2.1579
WT	7.4407	7.3035	6.7899	0.4302	2.2353
WT	16.5834	3.5007	6.8003	0.3153	2.2053
WT	8.6564	6.161	7.1111	0.449	2.2022
WT	9.0941	5.9044	7.3381	0.3573	2.262
WT	5.3981	8.7971	6.8203	0.1686	2.1441
WT	6.1276	9.2691	7.5522	0.3	2.1905
WT	11.7689	4.9196	7.9295	0.2658	2.1157
WT	3.5501	15.7513	7.8585	0.3689	2.274
WT	8.316	6.5874	8.3246	0.2363	2.1754
WT	6.5653	8.277	7.1243	0.2195	2.2222
WT	4.0364	11.7156	7.8284	0.2642	2.241
WT	3.307	17.554	6.7778	0.4247	2.2794
WT	1.7507	32.1866	6.5528	0.342	2.1944
WT	2.1398	26.1641	6.7648	0.472	2.2955
WT	2.383	23.578	8.0554	0.2067	2.2653
WT	3.7933	6.4982	7.2192	0.7819	2.4359
WT	6.3708	9.1011	8.3089	0.4173	2.2519
WT	14.9299	4.0206	6.8699	0.4436	2.241
WT	3.8905	14.0006	6.2853	0.3123	2.1625
WT	1.0699	46.6584	6.0057	0.09	2.0455
WT	2.383	23.0022	7.3972	0.2113	2.1429
WT	0.924	61.3322	6.9428	0.2722	2.2632
WT	2.3343	23.3374	8.0582	0.2723	2.1667
WT	46.0056	1.2958	7.3192	0.528	2.259
WT	17.556	2.9758	7.4798	0.4954	2.2188
WT	2.6261	18.6013	7.3016	0.1681	2.2037
WT	13.0333	4.584	7.1658	0.4262	2.209
WT	14.0546	4.1734	6.5518	0.5251	2.2076
WT	8.851	6.0374	7.3281	0.3349	2.3187
WT	4.896	11.2881	8.141	0.3925	2.3333
WT	19.9015	2.9962	7.959	0.2717	2.2711
WT	1.3147	42.8114	13.1281	0.2702	2.3103
WT	7.1174	8.3462	7.6491	0.2397	2.1401
WT	11.8321	4.9818	8.0459	0.2189	2.3065
WT	3.264	16.9041	7.468	0.3413	2.1944
WT	19.9922	2.9479	7.5144	0.2636	2.2154
WT	5.3494	11.1332	7.399	0.4317	2.3305
WT	1.768	16.1525	8.4173	0.5805	2.5897
WT	9.8828	5.997	7.7334	0.3761	2.2202
WT	26.7469	2.2352	8.7769	0.349	2.3525
WT	3.672	12.5485	8.2223	0.3681	2.3086
WT	2.5387	17.7094	7.9855	0.3264	2.25
WT	12.6481	4.6954	7.3679	0.2946	2.2652
WT	2.9014	20.3508	6.1925	0.4403	2.1875
WT	8.7041	6.8668	7.8384	0.2623	2.1875
WT	17.8162	3.3507	7.6438	0.4501	2.341
WT	3.8534	10.1282	7.6438	0.3363	2.2118
WT	24.9789	2.3661	7.8112	0.3917	2.2976
WT	3.7627	13.0616	7.9346	0.2405	2.2048
WT	1.7227	34.927	7.9096	0.1214	2.3158
WT	2.856	20.8508	7.4167	0.1181	2.2381
WT	0.9067	57.3072	10.4617	0.6526	3.1
WT	2.448	19.0453	6.5752	0.6382	2.3519
WT	5.712	10.1746	6.5782	0.4873	2.2778
WT	1.632	20.4465	7.2576	0.3853	2.3333
WT	5.0774	11.0003	10.1036	0.3385	2.5357
WT	3.8987	14.1072	8.5655	0.2506	2.407
WT	5.032	11.6589	7.6163	0.2569	2.2793
WT	19.6748	2.9976	7.5808	0.2853	2.2834
WT	5.4854	10.3049	7.3175	0.2242	2.281
WT	6.0294	9.4481	54.2734	0.3887	2.2857
WT	43.747	1.3705	7.1534	0.4309	2.2632
WT	16.0481	3.7204	7.3145	0.327	2.2034
WT	9.6561	6.0123	7.8611	0.32	2.3286
WT	0.68	28.3075	8.7387	0.0754	2.0667
WT	7.0721	7.7794	7.9006	0.4387	2.25
WT	3.0374	16.5933	7.7904	0.3603	2.3284
WT	15.1415	3.9402	7.3238	0.2426	2.1617
WT	8.3414	7.1468	7.6202	0.2096	2.2717
WT	14.0081	4.2251	6.3958	0.6521	2.2751
WT	3.8987	15.3578	7.7586	0.2118	2.1744
WT	15.7308	3.7885	7.0703	0.3154	2.2622
WT	1.632	31.8511	7.7294	0.4703	2.4167
WT	7.7067	7.7406	7.0864	0.2804	2.2235
WT	4.216	13.8651	7.0138	0.1915	2.172
WT	32.6403	1.8266	7.888	0.3767	2.2722
WT	18.1788	3.1776	6.6888	0.3832	2.1072
WT	5.2134	11.4263	9.7847	0.351	2.5304
WT	7.2534	6.7753	8.343	0.2415	2.1875
WT	6.3921	9.2996	7.1881	0.2595	2.2199
WT	3.7627	14.8544	7.7688	0.1453	2.1566
WT	6.6641	8.8166	7.7291	0.2169	2.1293

## Sheet: Table 1 - Awake-rest
Group	Bursts per min	Mean inter-burst interval (s)	Mean burst duration (ms)	% of spikes in burst	Nb. Spikes per burst				Bursts per min	Mean inter-burst interval (s)	Mean burst duration (ms)	% of spikes in burst	Nb. Spikes per burst
Dp16	0.9687	42.989	10.9421	0.25	2.2813		Dp16	avg.	5.74097	56.1438	8.28126	0.222632	2.26398
Dp16	0.0908	284.617	7.8437	0.0923	2			SEM	0.468489	6.63977	0.0724145	0.00724629	0.0090266
Dp16	19.6153	3.0528	10.0833	0.1124	2.287		WT	avg.	7.15233	30.0612	12.7182	0.297012	2.37394
Dp16	0.1816	186.398	8.4735	0.0253	2			SEM	0.685228	2.14052	4.25145	0.00775564	0.0100505
Dp16	1.3319	43.3107	8.2112	0.1062	2.0909
Dp16	0.9384	50.4204	7.9159	0.1409	2.0323			pvalue	0.0315025	0.0319834	0.130456	9.58003e-12	1.58683e-14
Dp16	0.1514	410.581	9.8612	0.0485	2.2
Dp16	2.0281	28.3848	8.4728	0.3165	2.1493
Dp16	2.8152	19.9651	10.7134	0.2807	2.3118
Dp16	0.1514	254.984	16.1404	0.0648	2.8
Dp16	2.6638	22.5055	9.7798	0.1361	2.125
Dp16	0.787	69.6379	8.3724	0.0792	2.0385
Dp16	3.7536	14.8478	9.7121	0.1326	2.0968
Dp16	6.8412	8.3819	9.4203	0.1456	2.1504
Dp16	0.0303	NaN	8.54	0.0022	2
Dp16	6.4779	9.1602	9.6433	0.3029	2.1682
Dp16	0.2422	238.292	13.3555	0.0125	2.5
Dp16	28.4241	2.1038	6.7261	0.1131	2.0927
Dp16	2.7244	21.3247	9.4576	0.1611	2.0778
Dp16	3.1179	19.3779	7.7478	0.1776	2.0291
Dp16	0.1514	312.876	8.2268	0.0219	2
Dp16	0.0303	NaN	9.954	0.0034	2
Dp16	0.1816	159.817	7.7927	0.055	2
Dp16	0.1625	247.251	9.222	0.1091	2.4
Dp16	0.5524	74.0263	8.607	0.2533	2.2353
Dp16	1.7546	28.9073	7.276	0.2972	2.1296
Dp16	1.9496	29.9206	9.5611	0.1454	2.35
Dp16	3.2493	18.316	8.4305	0.348	2.37
Dp16	1.3647	43.7699	8.0523	0.1537	2.4048
Dp16	3.8342	12.113	7.9565	0.4	2.322
Dp16	1.2022	44.7324	9.3148	0.3072	2.4324
Dp16	0.9098	49.9499	9.6011	0.2734	2.6071
Dp16	1.0723	43.6782	8.4936	0.1939	2.303
Dp16	1.7221	34.6504	9.7022	0.243	2.4717
Dp16	1.0398	58.123	8.1907	0.2444	2.375
Dp16	3.7692	14.0723	9.5534	0.1688	2.4569
Dp16	3.1843	17.8351	7.1528	0.4308	2.2245
Dp16	0.8773	61.7862	8.4422	0.2461	2.3333
Dp16	2.1445	27.5348	8.1035	0.1508	2.1667
Dp16	19.7234	3.0269	7.5582	0.3347	2.2241
Dp16	56.8955	1.0527	8.8485	0.3816	2.281
Dp16	5.5238	10.6972	8.1809	0.2129	2.3176
Dp16	1.7546	28.9657	8.3826	0.2586	2.3704
Dp16	0.1625	349.9	8.663	0.1375	2.2
Dp16	1.2022	33.6661	8.3309	0.4564	2.4054
Dp16	0.7148	79.0514	9.8192	0.2169	2.4545
Dp16	3.4443	17.1231	7.9817	0.47	2.5094
Dp16	2.1445	22.1891	6.8995	0.239	2.2121
Dp16	0.5199	80.781	8.663	0.1477	2.1875
Dp16	4.874	11.93	8.0346	0.2969	2.3933
Dp16	1.0723	41.3707	8.5458	0.2432	2.4242
Dp16	1.8196	29.5624	8.9576	0.2237	2.4286
Dp16	3.2493	18.3447	7.9043	0.1198	2.12
Dp16	9.1956	6.4064	9.7857	0.239	2.477
Dp16	0.5524	88.0444	8.5132	0.1835	2.3529
Dp16	0.5524	84.8407	7.8718	0.1625	2.2941
Dp16	1.6572	33.7838	8.154	0.1762	2.2941
Dp16	2.0471	24.5671	8.6274	0.3134	2.4127
Dp16	15.7592	3.7844	7.1322	0.3284	2.301
Dp16	25.4097	2.3491	7.963	0.7239	2.5614
Dp16	0.7798	72.2581	8.3175	0.2137	2.2083
Dp16	4.3216	13.6104	8.3588	0.4263	2.4361
Dp16	14.492	4.0412	7.5943	0.521	2.4439
Dp16	11.5351	5.1838	7.3578	0.452	2.3718
Dp16	15.4343	3.8776	7.6931	0.2141	2.2358
Dp16	1.7871	27.9286	9.7572	0.4931	2.6
Dp16	17.9362	3.3387	7.7078	0.6135	2.4529
Dp16	4.4841	13.1236	6.7964	0.5565	2.2826
Dp16	6.4661	8.7578	6.9145	0.4857	2.3116
Dp16	2.7294	20.6764	7.6338	0.2646	2.3214
Dp16	33.0131	1.8144	8.0501	0.3583	2.1526
Dp16	4.3216	13.7701	8.6259	0.2148	2.3534
Dp16	17.2864	3.4665	7.1944	0.2259	2.1974
Dp16	7.3435	8.019	8.3132	0.2527	2.2035
Dp16	0.5718	102.369	8.5794	0.1304	2.3333
Dp16	0.2541	160.316	6.8196	0.0672	2
Dp16	0.2224	191.752	12.0331	0.2308	2.5714
Dp16	5.9406	9.8771	8.45	0.0859	2.1872
Dp16	10.2293	5.815	8.8639	0.1865	2.3727
Dp16	1.366	41.5569	8.283	0.157	2.4419
Dp16	0.3177	175.691	7.7353	0.2243	2.4
Dp16	0.0953	692.177	8.059	0.0534	2.3333
Dp16	0.7307	84.3204	8.8045	0.3436	2.4348
Dp16	0.0635	156.967	7.634	0.0193	2
Dp16	2.4144	24.2581	8.3813	0.4552	2.4079
Dp16	0.3494	184.205	7.4483	0.0203	2
Dp16	0.0635	1245.09	5.683	0.0449	2
Dp16	1.2707	37.4586	7.8249	0.1577	2.125
Dp16	0.8895	61.1034	8.4514	0.2342	2.25
Dp16	1.3343	44.0763	7.0187	0.0598	2.0238
Dp16	4.924	11.4127	8.1983	0.2145	2.2581
Dp16	6.2901	9.4278	8.9806	0.2879	2.4091
Dp16	29.7666	2.0058	8.6939	0.1461	2.2113
Dp16	6.7348	8.7725	8.2847	0.1826	2.2642
Dp16	0.4765	117.263	6.9509	0.0135	2.0667
Dp16	2.0649	28.6369	7.8482	0.3402	2.2923
Dp16	1.5884	38.2429	6.9421	0.2655	2.14
Dp16	7.0207	8.4551	8.1508	0.3545	2.371
Dp16	0.2541	199.486	10.4219	0.202	2.5
Dp16	2.3826	23.7355	8.312	0.3282	2.28
Dp16	2.6685	21.9773	8.302	0.2362	2.2381
Dp16	4.1616	14.4134	8.4842	0.3287	2.3664
Dp16	3.6851	16.0045	7.7933	0.1561	2.1638
Dp16	1.3025	44.431	8.5927	0.1538	2.1951
Dp16	2.3826	23.2307	7.6608	0.3199	2.32
Dp16	0.7307	77.3937	7.5971	0.0539	2.1739
Dp16	13.5649	4.4091	6.836	0.2636	2.1827
Dp16	14.2321	4.2177	6.8983	0.2124	2.1563
Dp16	1.5884	36.9352	8.7109	0.3098	2.28
Dp16	0.0953	472.227	6.8407	0.0203	2
Dp16	27.6699	2.1596	9.8406	0.3079	2.4282
Dp16	21.634	2.7608	7.6091	0.3108	2.2115
Dp16	2.7003	21.9144	7.6482	0.2257	2.2353
Dp16	0.8577	68.4942	8.5231	0.2388	2.3704
Dp16	1.0166	54.204	8.6717	0.2191	2.4375
Dp16	8.3867	7.0172	8.543	0.1471	2.2273
Dp16	0.3177	175.252	6.9948	0.1316	2
Dp16	3.145	18.5053	7.8051	0.1642	2.202
Dp16	3.6851	15.7311	8.1294	0.3743	2.3103
Dp16	6.7348	8.9448	7.4409	0.0785	2.1226
Dp16	0.5401	104.723	8.6523	0.0191	2.0588
Dp16	3.1133	17.7784	7.7411	0.1313	2.0714
Dp16	2.5732	21.2015	8.2477	0.3076	2.358
Dp16	4.924	12.1644	8.1985	0.1476	2.3742
Dp16	23.1271	2.5826	9.8455	0.2756	2.4766
Dp16	6.3536	9.3359	6.7003	0.1459	2.24
Dp16	1.2707	44.9395	8.319	0.1694	2.325
Dp16	3.0497	19.1673	7.591	0.247	2.1667
Dp16	13.4696	4.4593	7.6019	0.3287	2.2972
Dp16	1.0801	54.1207	10.2903	0.1721	2.5
Dp16	0.1906	360.505	11.7555	0.1441	2.8333
Dp16	0.0318	NaN	7.219	0.0073	2
Dp16	20.395	2.9012	6.7039	0.3563	2.2477
Dp16	0.6036	92.91	8.2879	0.0572	2.1053
Dp16	8.5774	6.8846	7.596	0.1885	2.3
Dp16	0.953	39.8688	8.1417	0.2366	2.2
Dp16	0.4765	107.592	9.5315	0.216	2.3333
Dp16	16.837	3.5417	7.7265	0.2816	2.2434
Dp16	1.3343	44.7602	7.9404	0.162	2.1905
Dp16	1.779	18.3974	8.1941	0.2224	2.0893
Dp16	0.2541	254.806	8.1371	0.1667	2.375
Dp16	1.779	13.1024	8.5906	0.1691	2.0893
Dp16	0.3494	151.393	9.7745	0.2478	2.5455
Dp16	0.2224	182.943	9.0624	0.0994	2.2857
Dp16	6.9254	7.9308	7.3295	0.3049	2.1606
Dp16	20.4268	2.8547	7.1041	0.3021	2.2722
Dp16	5.7182	10.4558	7.7505	0.206	2.25
Dp16	2.732	21.8102	6.422	0.0716	2.0349
Dp16	2.3508	22.0697	8.2197	0.2066	2.2703
Dp16	11.5953	5.1634	7.3903	0.2154	2.2274
Dp16	0.5718	94.0796	5.5143	0.0286	2
Dp16	3.145	17.8302	7.9874	0.1585	2.2121
Dp16	1.2072	41.5052	6.5523	0.1413	2.0789
Dp16	2.192	25.63	8.1604	0.1902	2.2464
Dp16	0.6354	88.2929	9.0101	0.1557	2.25
Dp16	2.5414	23.4142	8.1112	0.2009	2.2625
Dp16	0.3177	157.458	7.5817	0.2447	2.3
Dp16	1.3343	44.1324	6.5719	0.1818	2.0952
Dp16	0.7624	58.7689	10.4333	0.3214	2.625
Dp16	35.4213	1.6914	7.2305	0.3178	2.2161
Dp16	9.6554	6.2054	8.6031	0.3984	2.4086
Dp16	9.9121	5.758	8.9844	0.2311	2.3269
Dp16	10.8423	5.4922	8.3759	0.2582	2.1923
Dp16	18.7976	3.1889	7.5882	0.434	2.1997
Dp16	34.8366	1.7229	7.3613	0.3273	2.1759
Dp16	1.7001	34.8323	7.1195	0.1303	2.1509
Dp16	1.636	37.0002	9.0836	0.1095	2.2745
Dp16	18.2523	3.284	7.7691	0.2535	2.1757
Dp16	11.4839	5.1305	9.4194	0.5663	2.4218
Dp16	2.6625	18.0122	8.7711	0.4347	2.3253
Dp16	5.2287	10.2785	8.2921	0.2508	2.2699
Dp16	7.3458	8.1676	8.1958	0.2581	2.1659
Dp16	2.1492	17.6277	8.5338	0.429	2.3881
Dp16	10.2649	5.8264	7.6296	0.0933	2.0781
Dp16	11.5801	5.116	8.1381	0.3816	2.2327
Dp16	2.9512	18.0177	8.6206	0.2802	2.3696
Dp16	1.0586	32.0138	8.6557	0.2841	2.2727
Dp16	4.6834	12.6106	8.807	0.4628	2.3425
Dp16	5.4212	8.2997	8.5874	0.4994	2.3195
Dp16	28.1002	2.1374	8.7185	0.3294	2.3904
Dp16	0.3849	96.4855	12.1756	0.1271	2.5
Dp16	1.5397	31.9671	9.024	0.3352	2.4792
Dp16	14.435	4.109	9.0234	0.3244	2.4889
Dp16	2.9832	19.8264	9.4191	0.3062	2.5054
Dp16	3.4965	17.139	8.3062	0.1899	2.2477
Dp16	17.0975	3.451	8.4235	0.2746	2.2927
Dp16	1.5718	16.3262	9.2938	0.2526	2.4898
Dp16	5.0683	11.7037	8.9825	0.2819	2.4304
Dp16	0.2245	197.923	10.2651	0.029	2.2857
Dp16	0.8019	77.7658	8.5461	0.2113	2.24
Dp16	10.2008	5.7663	7.4924	0.2047	2.1761
Dp16	0.8982	63.4091	7.1436	0.1099	2.1786
Dp16	4.0418	11.0105	9.5473	0.2365	2.4286
Dp16	2.9191	18.4612	9.5468	0.2262	2.5055
Dp16	5.9986	9.8106	7.2274	0.1312	2.1497
Dp16	0.7057	34.0832	7.8113	0.043	2.0909
Dp16	0.0642	25.9757	9.5235	0.0153	2
Dp16	0.9944	40.6788	9.2457	0.2226	2.4194
Dp16	8.6931	6.6626	8.3801	0.3315	2.2841
Dp16	0.8019	53.7825	7.7795	0.0842	2.2
Dp16	18.8939	3.1206	8.1193	0.2886	2.275
Dp16	9.495	6.2644	8.6996	0.2266	2.2061
Dp16	1.4114	42.8178	9.0393	0.1102	2.4091
Dp16	3.1757	18.9311	10.4169	0.232	2.5354
Dp16	1.251	46.738	8.007	0.2037	2.2308
Dp16	2.7908	20.9841	8.8343	0.0948	2.2874
Dp16	25.5019	2.3541	6.8975	0.1452	2.1132
Dp16	9.5271	6.1995	8.0818	0.2866	2.2357
Dp16	1.0586	56.1856	7.9825	0.1133	2.2424
Dp16	23.1027	2.5693	8.0271	0.4344	2.2497
Dp16	31.5089	1.8691	7.9476	0.507	2.4112
Dp16	1.3044	33.7859	7.7688	0.2481	2.2
Dp16	3.3335	15.9308	7.9212	0.223	2.2087
Dp16	2.232	25.3127	6.9104	0.102	2.1688
Dp16	9.2179	6.4803	7.2579	0.1825	2.1761
Dp16	5.1017	11.1243	7.8611	0.1625	2.2273
Dp16	0.2319	81.6735	7.0081	0.3462	2.25
Dp16	0.7247	65.0236	9.5035	0.2105	2.4
Dp16	0.4638	83.1617	9.6383	0.26	2.4375
Dp16	12.8992	4.5996	7.0132	0.2986	2.2292
Dp16	0.1449	377.073	7.6308	0.0932	2.2
Dp16	0.7827	64.4513	8.7586	0.2686	2.4074
Dp16	1.3044	46.7231	7.7346	0.1818	2.2222
Dp16	3.3045	17.8115	6.9449	0.0977	2.1404
Dp16	1.0725	53.8497	6.6439	0.1969	2.0811
Dp16	6.2612	9.3374	8.6241	0.1765	2.1296
Dp16	0.5797	97.5447	8.3865	0.0962	2.25
Dp16	5.2467	10.9823	9.5972	0.6394	2.547
Dp16	0.5218	72.1451	7.6578	0.3509	2.2222
Dp16	11.5658	5.0698	7.2198	0.4012	2.1729
Dp16	0.6377	84.0484	9.5525	0.1573	2.5455
Dp16	1.2175	47.5941	8.402	0.0795	2.0952
Dp16	26.3203	2.2619	6.7082	0.4993	2.3436
Dp16	22.9288	2.6179	6.8294	0.3251	2.2238
Dp16	5.7974	10.1592	8.7803	0.1786	2.385
Dp16	13.363	4.4535	6.9423	0.1713	2.1649
Dp16	2.8697	19.6408	9.5545	0.2045	2.4646
Dp16	2.9857	19.7825	7.4841	0.1754	2.1068
Dp16	2.4059	24.6197	8.5113	0.2294	2.2169
Dp16	0.2319	262.863	7.6262	0.1037	2.125
Dp16	3.3915	17.3587	6.9401	0.2741	2.1368
Dp16	5.1307	11.2608	7.1566	0.3154	2.2825
Dp16	0.3478	165.37	5.2404	0.0057	2
Dp16	19.2764	3.0906	7.5212	0.2307	2.2992
Dp16	2.232	25.6041	7.6872	0.2532	2.0649
Dp16	0.4058	148.654	8.2836	0.0982	2.2857
Dp16	4.551	12.746	7.7779	0.2149	2.1911
Dp16	3.6814	16.0967	7.7821	0.1554	2.1654
Dp16	1.3044	42.0886	8.8842	0.1266	2.2444
Dp16	5.6235	10.5672	7.9193	0.2397	2.2268
Dp16	2.4059	24.2145	7.1559	0.2224	2.0361
Dp16	4.9568	12.028	7.2458	0.1686	2.1988
Dp16	8.957	6.7058	6.8325	0.2089	2.1974
Dp16	4.1162	13.2015	7.6458	0.1999	2.1408
Dp16	7.4207	8.0912	8.3524	0.234	2.2969
Dp16	5.7684	10.3067	7.706	0.2725	2.2965
Dp16	0.8406	66.7141	6.575	0.1793	2.0345
Dp16	0.4583	93.8104	10.3416	0.3089	2.7143
Dp16	1.8006	30.6824	9.0864	0.3492	2.5273
Dp16	10.3454	5.8008	8.1211	0.2132	2.231
Dp16	2.8155	21.0786	8.5923	0.1097	2.1628
Dp16	2.3244	25.7071	6.7533	0.0857	2.1268
Dp16	11.6877	5.1201	7.6771	0.1544	2.112
Dp16	14.6341	4.108	8.2231	0.1794	2.1253
Dp16	31.6255	1.8684	8.0621	0.4034	2.2143
Dp16	3.7649	15.7001	7.8248	0.3612	2.3304
Dp16	10.018	5.9175	9.6714	0.2231	2.3203
Dp16	2.4554	24.6782	8.1428	0.1442	2.1867
Dp16	7.6281	7.7825	8.8505	0.2554	2.2661
Dp16	9.1013	6.5486	7.7818	0.1778	2.2482
Dp16	4.9435	12.1884	12.1718	0.3117	2.5099
Dp16	3.8304	15.6699	9.2415	0.1996	2.359
Dp16	0.4583	129.338	4.7791	0.0226	2
Dp16	3.2411	18.555	10.4017	0.2063	2.596
Dp16	9.1995	6.3753	9.3757	0.2216	2.2847
Dp16	0.9822	61.3767	8.407	0.1697	2.2
Dp16	27.5986	2.173	7.4807	0.3278	2.2147
Dp16	1.9971	30.3474	9.4864	0.3402	2.4426
Dp16	0.5566	101.79	9.8106	0.1767	2.4118
Dp16	1.1131	53.3471	5.3804	0.0238	2.0294
Dp16	8.6102	6.9838	7.9485	0.125	2.1673
Dp16	2.9465	20.5436	7.4725	0.1445	2.2
Dp16	1.2441	46.125	9.2363	0.2179	2.3684
Dp16	1.0804	49.5778	7.115	0.2011	2.1515
Dp16	1.0149	57.7807	7.9376	0.1777	2.1613
Dp16	1.1459	53.3565	8.2391	0.1506	2.3143
Dp16	8.021	7.4092	7.6646	0.3561	2.2327
Dp16	0.0655	601.072	4.9155	0.0194	2
WT	14.1356	4.2031	8.3127	0.5014	2.4032
WT	8.8188	6.5529	8.2352	0.5229	2.3899
WT	3.2792	16.303	8.2953	0.4961	2.4951
WT	0.3184	136.522	11.1881	0.139	2.6
WT	0.9551	60.4321	7.5868	0.287	2.2
WT	0.6686	75.2234	7.1167	0.1883	2.1429
WT	1.751	30.4274	9.0233	0.1737	2.4727
WT	0.382	120.568	10.9442	0.2797	2.75
WT	2.3878	22.2621	9.1767	0.2342	2.3733
WT	1.6555	33.1308	1336.65	0.3798	2.6731
WT	1.178	42.7278	8.6422	0.1956	2.3784
WT	12.3209	4.8033	7.361	0.1989	2.2455
WT	3.6931	16.2408	8.1159	0.1957	2.1983
WT	1.56	36.3688	6.8751	0.0969	2.1224
WT	2.7698	21.2897	7.1058	0.3404	2.2184
WT	5.2849	10.0489	7.3515	0.5631	2.5
WT	79.7196	0.7525	7.3535	0.5414	2.4002
WT	30.5953	1.9205	7.3491	0.3242	2.4381
WT	2.7698	17.0557	7.8725	0.2326	2.4138
WT	0.4139	116.198	8.2684	0.148	2.2308
WT	10.6972	5.2564	7.2001	0.5053	2.3929
WT	4.5208	13.1015	9.4442	0.2465	2.493
WT	1.6237	28.8557	8.5889	0.3937	2.4314
WT	3.6294	16.0374	8.1117	0.2227	2.3246
WT	0.6367	62.4728	9.2267	0.2248	2.45
WT	2.4196	24.4026	8.4981	0.2285	2.2763
WT	1.6874	35.4989	10.9161	0.2799	2.6038
WT	4.0115	14.6293	8.1489	0.3166	2.3571
WT	2.4833	22.1137	10.5263	0.4735	2.7436
WT	3.9478	14.9507	8.6925	0.2012	2.4355
WT	80.8658	0.7409	7.0407	0.7157	2.4067
WT	30.8181	1.9463	6.8864	0.5931	2.3636
WT	12.3209	4.7523	7.5245	0.3362	2.2506
WT	2.6743	20.9904	7.7268	0.2329	2.3452
WT	2.1967	26.6377	7.7009	0.35	2.4348
WT	5.2849	10.533	8.3627	0.3854	2.3193
WT	2.2531	24.9891	8.0547	0.3102	2.32
WT	5.4376	10.7408	7.8884	0.3467	2.2983
WT	31.9644	1.8761	6.9247	0.4818	2.3985
WT	1.5321	38.3288	9.0756	0.2247	2.3922
WT	0.721	71.4379	7.5045	0.0163	2.125
WT	10.3644	5.791	7.9541	0.3765	2.2754
WT	34.2175	1.7427	8.3186	0.2017	2.2046
WT	0.5708	95.2292	5.8965	0.0384	2
WT	1.412	40.3189	8.6768	0.345	2.2979
WT	5.4976	10.9304	8.5642	0.2205	2.3607
WT	5.4376	10.7023	8.2496	0.2523	2.3867
WT	1.472	33.0475	8.7001	0.3081	2.3265
WT	5.738	10.2721	7.4463	0.4351	2.2827
WT	5.1972	10.715	7.7649	0.2596	2.1965
WT	4.9869	11.6217	8.379	0.3185	2.3675
WT	1.6823	34.1574	8.5769	0.213	2.3393
WT	12.4673	4.7775	35.254	0.3336	2.3253
WT	2.914	19.8124	7.5455	0.2599	2.1649
WT	5.1371	11.5858	8.183	0.2944	2.3275
WT	7.4804	7.9643	7.8763	0.2207	2.2691
WT	0.5107	74.7018	8.7082	0.2216	2.4118
WT	0.721	64.6489	8.3008	0.2627	2.375
WT	1.0214	42.9188	9.7302	0.2677	2.5588
WT	3.1544	18.5044	10.204	0.3601	2.6095
WT	0.3305	145.509	7.9424	0.0378	2
WT	7.3001	8.1773	11.604	0.4296	2.9012
WT	4.0556	14.4907	8.4808	0.373	2.4148
WT	6.7594	8.697	7.7304	0.2298	2.2578
WT	0.4506	133.815	8.8064	0.0973	2.2
WT	0.5408	55.7651	8.1818	0.3413	2.3889
WT	5.7079	10.1848	7.7026	0.1649	2.2474
WT	6.1586	9.6605	8.3768	0.2495	2.3659
WT	0.6609	77.613	7.3057	0.2149	2.2273
WT	4.4161	13.2646	7.4453	0.156	2.2109
WT	1.3819	34.3614	10.2478	0.4058	2.7609
WT	4.4161	13.225	7.2691	0.1567	2.1905
WT	3.1544	18.344	9.1613	0.1862	2.419
WT	4.5363	12.6014	7.579	0.4471	2.3245
WT	4.5663	12.0534	8.4361	0.6444	2.5395
WT	32.2047	1.8294	9.2394	0.1988	2.2929
WT	2.854	20.704	7.8142	0.26	2.2632
WT	6.0684	9.6409	8.0705	0.3005	2.297
WT	6.8796	8.6095	7.3742	0.2989	2.2751
WT	0.1803	147.477	10.793	0.1415	2.5
WT	10.815	5.5258	8.2475	0.3402	2.2472
WT	1.8325	31.7497	8.0467	0.1379	2.1967
WT	1.3519	37.6397	9.1552	0.1709	2.4
WT	6.6993	8.7132	7.4689	0.2975	2.296
WT	2.0729	28.0358	8.4712	0.193	2.3188
WT	2.7939	21.263	9.6947	0.1843	2.6237
WT	8.0812	7.3866	7.5749	0.3463	2.3123
WT	10.7249	5.5731	8.4381	0.2507	2.3137
WT	3.3947	16.9629	8.187	0.1991	2.2655
WT	1.2918	38.6245	9.306	0.2773	2.4186
WT	2.9441	20.365	7.6126	0.2071	2.3367
WT	7.7207	7.7827	8.5783	0.3272	2.4086
WT	0.4807	70.3247	8.1867	0.1164	2.3125
WT	3.635	14.8126	9.6865	0.4713	2.6446
WT	7.901	7.5066	6.0887	0.4576	2.2548
WT	6.6693	8.5412	7.6657	0.5367	2.4054
WT	9.4932	6.1112	7.9971	0.5595	2.5
WT	8.5319	6.868	7.9803	0.5897	2.5915
WT	43.6807	1.3737	7.5474	0.4616	2.2435
WT	16.7633	3.5754	7.1715	0.3691	2.3495
WT	6.6092	8.9098	7.6346	0.2384	2.35
WT	27.3079	2.1753	7.3807	0.6159	2.4895
WT	2.884	18.709	8.3085	0.4101	2.375
WT	4.1758	14.1162	8.5218	0.287	2.3453
WT	2.193	23.7456	8.6992	0.2693	2.4795
WT	7.3302	8.1835	7.8148	0.342	2.2705
WT	0.691	47.6	7.7653	0.2905	2.2609
WT	8.0512	7.3199	7.5449	0.3475	2.3246
WT	1.0815	44.1347	8.018	0.3118	2.2778
WT	0.2704	199.244	5.5807	0.1488	2
WT	22.4412	2.6755	8.6686	0.1357	2.2222
WT	0.5107	67.5098	9.1256	0.253	2.4706
WT	3.7853	14.4706	7.9416	0.2133	2.2937
WT	1.1416	42.6236	8.8523	0.3214	2.3684
WT	1.9227	29.5355	6.5486	0.0112	2.0781
WT	1.2017	47.6435	9.0362	0.2016	2.475
WT	16.6431	3.5616	6.4615	0.5068	2.2058
WT	5.1371	11.5053	8.555	0.266	2.4094
WT	3.8453	14.5461	8.4236	0.247	2.3828
WT	1.3819	31.3682	8.8352	0.3459	2.3913
WT	0.691	73.5319	7.6493	0.1052	2.1304
WT	0.3173	179.088	8.0065	0.1757	2.3636
WT	0.2019	208.9	6.7977	0.0785	2.1429
WT	1.471	39.6689	8.5395	0.1845	2.2941
WT	3.0285	19.7831	9.6599	0.211	2.4095
WT	2.3651	24.1844	9.0231	0.2761	2.5488
WT	4.1533	13.8659	9.0106	0.2406	2.3889
WT	9.9506	5.9928	8.28	0.1939	2.2725
WT	9.143	6.3702	7.0855	0.2531	2.1893
WT	1.3556	41.3339	9.8965	0.3567	2.5957
WT	0.4326	59.4284	8.0937	0.3763	2.3333
WT	1.0383	55.7382	10.1845	0.2271	2.6111
WT	0.1731	303.546	12.8665	0.068	2.8333
WT	1.2979	45.3205	8.4268	0.3116	2.4444
WT	5.7108	10.3914	8.4273	0.2814	2.4697
WT	0.8364	55.921	9.6228	0.1945	2.4483
WT	0.8653	51.6207	8.8771	0.1276	2.2333
WT	3.5188	16.5653	8.5306	0.1291	2.2459
WT	0.6057	85.7531	7.9272	0.2293	2.2381
WT	0.2884	114.133	10.1561	0.142	2.4
WT	22.2663	2.6905	8.1984	0.2468	2.3096
WT	0.8364	66.8151	8.1525	0.1762	2.3448
WT	14.825	3.9634	7.7763	0.286	2.1673
WT	1.6729	34.8969	9.6481	0.1499	2.3966
WT	1.6152	34.9724	6.7775	0.1118	2.1607
WT	31.4094	1.9049	7.8007	0.3588	2.3444
WT	0.6057	90.2081	8.0236	0.1925	2.1905
WT	0.1731	149.466	10.2502	0.1368	2.1667
WT	1.0095	55.1771	8.5341	0.2206	2.5714
WT	3.3457	17.6573	6.8477	0.0861	2.2155
WT	0.0288	NaN	6.727	0.0163	2
WT	5.4512	10.5444	7.6431	0.1518	2.1164
WT	61.2036	0.9785	8.2363	0.3499	2.2729
WT	2.3362	25.0681	9.3225	0.1494	2.2469
WT	1.9613	27.9566	8.9981	0.2273	2.3235
WT	11.9696	4.9736	8.3343	0.358	2.3108
WT	39.9179	1.4972	7.89	0.3181	2.2319
WT	0.7787	32.0166	11.2674	0.2305	2.963
WT	1.1537	50.9774	6.8644	0.0625	2.1
WT	0.2307	57.4285	10.4294	0.2911	2.875
WT	3.0285	19.2744	9.0852	0.3564	2.5524
WT	4.4417	12.0475	9.4195	0.5038	2.5974
WT	5.2205	10.0491	6.5773	0.375	2.3204
WT	1.3268	40.4509	8.8	0.2747	2.4783
WT	6.6914	8.7906	8.3596	0.1896	2.2284
WT	6.8933	8.5973	8.0462	0.2487	2.2803
WT	28.1502	2.1198	8.048	0.4293	2.3248
WT	2.2209	26.9685	8.9759	0.5956	2.7922
WT	6.9222	8.6563	8.2577	0.2286	2.3583
WT	0.2307	145.807	12.0536	0.2421	2.875
WT	1.2114	44.8484	8.9527	0.4842	2.5476
WT	3.8937	15.4058	7.9888	0.0732	2.0593
WT	7.3548	8.0783	8.8558	0.439	2.4275
WT	0.375	74.3153	9.0056	0.121	2.6154
WT	1.1537	50.2299	8.4987	0.2733	2.35
WT	11.4216	5.2155	9.0336	0.2479	2.4318
WT	2.019	29.9737	10.8964	0.2876	2.8429
WT	4.4994	13.0284	8.3622	0.2832	2.4487
WT	1.2114	45.275	8.0238	0.2016	2.4048
WT	0.6057	59.5252	9.516	0.2045	2.5714
WT	10.989	5.3579	8.8944	0.3266	2.5827
WT	1.4998	37.4526	6.8582	0.277	2.2692
WT	2.7112	22.1561	8.9679	0.23	2.3191
WT	3.0573	19.3467	7.5319	0.0894	2.0849
WT	1.0095	55.8799	7.6977	0.1674	2.2
WT	0.4615	128.117	9.6441	0.198	2.4375
WT	1.4998	39.6878	8.8975	0.214	2.2885
WT	0.4326	135.421	7.8645	0.1371	2.2667
WT	61.5209	0.9739	7.3856	0.4332	2.2555
WT	2.8554	20.6846	7.6756	0.1154	2.1313
WT	0.3173	195.554	9.3388	0.2571	2.4545
WT	1.2979	43.6793	8.7621	0.1469	2.3111
WT	5.855	9.9871	8.1264	0.4576	2.3645
WT	0.9806	58.7447	9.0235	0.2618	2.4412
WT	0.6634	83.8354	7.9844	0.2639	2.4783
WT	1.1537	45.5542	10.5607	0.4084	2.675
WT	1.471	38.6486	9.0348	0.2902	2.3333
WT	3.6918	15.9567	7.7962	0.2068	2.1875
WT	5.8697	8.9355	7.8451	0.7114	2.6505
WT	5.1439	9.9958	8.9643	0.5012	2.5521
WT	67.3126	0.8916	7.1633	0.6321	2.3558
WT	6.7534	8.4823	7.7356	0.4297	2.2991
WT	0.7889	63.8389	6.338	0.0078	2
WT	2.9033	13.8103	8.9158	0.3801	2.5326
WT	2.1144	19.4685	9.772	0.5612	2.806
WT	2.6824	20.9564	8.8962	0.2706	2.4706
WT	4.5759	12.8163	7.9062	0.2819	2.2828
WT	1.5148	30.5843	8.8384	0.2871	2.5417
WT	2.209	25.8904	8.5195	0.4321	2.5
WT	3.8185	14.8106	9.1393	0.2005	2.4793
WT	1.8303	31.0532	9.8277	0.2211	2.569
WT	1.5148	30.919	9.9583	0.2719	2.4583
WT	7.8263	7.0915	10.4925	0.6398	2.8508
WT	7.5423	7.5173	8.4144	0.3145	2.3556
WT	7.132	8.3825	9.1395	0.3938	2.6593
WT	3.3136	15.3197	9.9609	0.4185	2.8857
WT	2.6508	20.9081	8.7856	0.4331	2.4643
WT	39.9836	1.4741	8.6701	0.6339	2.4759
WT	1.4517	36.0005	8.3752	0.3266	2.4565
WT	22.6269	2.6508	7.3646	0.4041	2.2343
WT	2.6508	17.4441	8.8547	0.4306	2.4762
WT	13.917	4.3128	7.2475	0.3189	2.254
WT	1.3254	44.1695	8.1437	0.267	2.2381
WT	1.357	41.1918	8.5887	0.2227	2.4651
WT	1.7672	32.8201	9.771	0.2144	2.5536
WT	2.3037	20.4513	7.8558	0.1873	2.0685
WT	6.2169	8.4728	8.8681	0.5576	2.4315
WT	2.5562	18.1191	8.4571	0.253	2.321
WT	16.8203	3.5062	7.7719	0.315	2.227
WT	6.0591	9.3836	10.1977	0.2989	2.3698
WT	1.5463	33.8849	8.2981	0.3173	2.4286
WT	55.1629	1.0874	9.0936	0.2376	2.2746
WT	11.3608	5.1545	10.4897	0.705	2.7417
WT	1.3254	43.9104	8.034	0.1377	2.1667
WT	2.7771	20.0706	9.599	0.5216	2.6023
WT	1.8935	21.2171	10.0162	0.363	2.7167
WT	2.0513	27.3693	8.5113	0.4313	2.4615
WT	3.3136	16.9462	6.7601	0.32	2.2095
WT	1.5779	37.471	8.9745	0.223	2.4
WT	3.4398	16.5082	7.3491	0.25	2.1376
WT	1.7672	32.4574	8.962	0.2345	2.4286
WT	1.0414	55.9748	7.7303	0.1766	2.1515
WT	2.3668	24.2977	8.3779	0.4612	2.4533
WT	1.1045	51.3199	8.7035	0.3607	2.2571
WT	78.8628	0.7582	8.0286	0.6219	2.3914
WT	1.0098	43.9202	7.4727	0.1579	2.1563
WT	1.2308	45.7382	7.109	0.1404	2.1282
WT	21.1752	2.8334	8.6827	0.4804	2.4501
WT	36.2283	1.6134	6.9126	0.5756	2.2883
WT	9.5936	6.1904	7.2889	0.2622	2.1974
WT	0.7738	65.8045	10.4777	0.4	2.5926
WT	1.3184	17.4036	8.5368	0.2706	2.5
WT	5.0156	11.6715	8.7105	0.2003	2.3943
WT	1.3184	29.2184	11.0058	0.4111	3.0652
WT	1.2324	27.1404	10.3268	0.2336	2.6512
WT	7.9676	7.4591	8.0606	0.1853	2.2806
WT	1.0318	54.874	10.4175	0.2804	2.5
WT	3.9265	15.1422	7.8062	0.1948	2.2044
WT	2.0922	27.3996	8.9566	0.3364	2.5205
WT	3.124	18.8815	8.4452	0.4579	2.3945
WT	2.2355	20.2678	8.2618	0.3101	2.3333
WT	10.9483	5.3857	10.0389	0.484	2.9764
WT	2.7801	20.1469	9.5004	0.3617	2.4124
WT	1.691	22.7895	6.9224	0.2902	2.1695
WT	1.4903	34.8083	7.7125	0.2705	2.1538
WT	1.9489	30.2454	8.5125	0.1836	2.3382
WT	18.9732	3.0668	8.3963	0.2815	2.2644
WT	10.3751	5.74	7.6534	0.1845	2.1713
WT	3.8118	15.0783	7.9318	0.4731	2.4436
WT	10.5757	5.6122	8.2155	0.2718	2.3523
WT	12.8685	4.6618	7.3698	0.2167	2.2116
WT	1.0604	39.9217	6.9999	0.2645	2.2162
WT	11.8941	4.9467	7.9822	0.4632	2.441
WT	0.2866	129.264	7.047	0.0846	2.2
WT	12.7825	4.5563	9.4007	0.3807	2.4462
WT	8.7987	6.6459	7.7811	0.2793	2.3029
WT	1.605	28.6571	8.5599	0.3207	2.4107
WT	3.4106	17.0703	7.8842	0.1958	2.4118
WT	1.7769	28.7158	7.7667	0.4105	2.4032
WT	1.8056	27.3851	6.6102	0.3939	2.2698
WT	3.2959	17.2103	8.4801	0.6235	2.7217
WT	4.1558	12.5215	8.2009	0.4647	2.4483
WT	1.8629	24.6713	7.5227	0.4661	2.4308
WT	9.4006	6.0701	7.7908	0.2778	2.2134
WT	2.2069	25.9966	7.9728	0.276	2.2727
WT	13.3271	4.4852	7.9936	0.4089	2.4194
WT	8.2255	7.2963	9.015	0.1952	2.3101
WT	6.9358	8.5803	7.8597	0.087	2.1364
WT	12.152	4.8405	7.7066	0.2174	2.3514
WT	4.4137	13.2948	8.5131	0.4374	2.4481
WT	20.6928	2.8628	7.5243	0.3568	2.2147
WT	5.1016	11.4974	9.407	0.2017	2.4157
WT	2.2642	26.0118	7.7363	0.25	2.3291
WT	22.1545	2.6794	10.0885	0.3347	2.4812
WT	8.7987	6.7173	7.8804	0.4547	2.2736
WT	3.4106	17.2775	8.5405	0.4	2.4202
WT	3.6972	15.9656	7.8019	0.2261	2.2946
WT	5.3882	11.0391	7.9392	0.0828	2.3883
WT	7.1938	8.1475	8.3276	0.5973	2.4821
WT	1.0031	34.5137	8.7561	0.1941	2.4286
WT	31.5264	1.9038	7.1329	0.3869	2.2391
WT	2.866	20.5726	7.3605	0.3863	2.31
WT	25.6797	2.2885	8.271	0.4271	2.3504
WT	5.7894	10.378	7.5314	0.2745	2.3168
WT	3.7832	15.1595	8.6379	0.3769	2.4242
WT	4.9582	10.4449	9.1652	0.3852	2.474
WT	1.347	25.8337	8.4683	0.2997	2.4043
WT	5.5601	10.6513	8.0284	0.1713	2.2371
WT	23.2149	1.7083	7.2824	0.2647	2.2074
WT	3.0093	19.54	7.6268	0.2289	2.2476
WT	6.8212	8.5681	8.0102	0.2727	2.2353
WT	2.1209	28.3367	7.0494	0.1636	2.1892
WT	6.9931	8.5428	7.5362	0.1598	2.2049
